# Supplementary material for: Renin–angiotensin system blockers, risk of SARS-CoV-2 infection and outcomes from CoViD-19: systematic review and meta-analysis
Source: Oxford University Press journal article supplement (doi:10.1093/ehjcvp/pvaa138), 2020-11-27
Supplement: pvaa138_supplementary_data.docx [file pvaa138_supplementary_data.docx]

Supplemental Online Appendix

Lee MMY, Docherty KF, Sattar N, Mehta N, Kalra A, Nowacki AS, Solomon SD, Vaduganathan M, Petrie MC, Jhund PS, McMurray JJV. Renin-angiotensin system blockers, risk of SARS-CoV-2 infection and outcomes from CoViD-19: systematic review and meta-analysis. *Eur Heart J Cardiovasc Pharmacother* 2020.

[Supplemental Tables 3](#_Toc54357374)

[Online Table 1. Selected characteristics of the 92 CoViD-19 observational studies included in qualitative and quantitative analysis 3](#_Toc54357375)

[Online Table 2. Larger (N ≥500) randomised controlled trials with renin-angiotensin system blockers 17](#_Toc54357376)

[Supplemental Results (Quantitative Analyses) 18](#_Toc54357377)

[Likelihood of a Positive SARS-COV-2 Test 18](#_Toc54357378)

[Severe Outcomes in CoViD-19 18](#_Toc54357379)

[Case-Fatality in CoViD-19 Patients 19](#_Toc54357380)

[Supplemental Results (Qualitative Analyses) 20](#_Toc54357381)

[Susceptibility to SARS-CoV-2 infection 20](#_Toc54357382)

[Severity of CoViD-19 and case-fatality rate 20](#_Toc54357383)

[Supplemental Discussion 21](#_Toc54357384)

[Genetics 21](#_Toc54357385)

[Supplemental Figures 22](#_Toc54357386)

[Online Central Figure. 22](#_Toc54357387)

[Online Figure 1. Risk of bias assessment (ROBINS-I tool) for 11 studies reporting likelihood of positive SARS-CoV-2 test 23](#_Toc54357388)

[Online Figure 2. Risk of bias assessment (ROBINS-I tool) for 61 studies reporting the severity of CoViD-19 24](#_Toc54357389)

[Online Figure 3. Risk of bias assessment (ROBINS-I tool) for 49 studies reporting case-fatality rate in CoViD-19 25](#_Toc54357390)

[Online Figure 4. Sensitivity analysis (tipping-point analysis) for case-fatality rate in patients with history of hypertension who had CoViD-19 26](#_Toc54357391)

[A. Eight additional studies (each with odds ratio of 6.30) do not tip the results 26](#_Toc54357392)

[B. Nine additional studies (each with odds ratio of 6.30) would be required to tip the results 27](#_Toc54357393)

[C. One additional study (even with an extreme odds ratio of 13.56) does not tip the results 28](#_Toc54357394)

[Online Figure 5. Sensitivity analysis (peer-reviewed vs. preprint articles) in patients with history of hypertension 29](#_Toc54357395)

[A. Likelihood of positive SARS-CoV-2 test in patients who were tested 29](#_Toc54357396)

[B. Hospital admission in patients who had CoViD-19 30](#_Toc54357397)

[C. Severe/critical CoViD-19 31](#_Toc54357398)

[D. Admission to ITU in patients who had CoViD-19 32](#_Toc54357399)

[E. Composite of mechanical ventilation/ITU/death in patients who had CoViD-19 33](#_Toc54357400)

[F. Case-fatality rate in patients who had CoViD-19 34](#_Toc54357401)

[Online Figure 6. Sensitivity analysis (by continent) in patients with history of hypertension 35](#_Toc54357402)

[A. Likelihood of positive SARS-CoV-2 test in patients who were tested 35](#_Toc54357403)

[B. Hospital admission in patients who had CoViD-19 36](#_Toc54357404)

[C. Severe/critical CoViD-19 37](#_Toc54357405)

[D. Admission to ITU in patients who had CoViD-19 38](#_Toc54357406)

[E. Composite of mechanical ventilation/ITU/death in patients who had CoViD-19 39](#_Toc54357407)

[F. Case-fatality rate in patients who had CoViD-19 40](#_Toc54357408)

[Online Figure 7. Likelihood of positive SARS-CoV-2 test in all patients (irrespective of history of hypertension) who were tested 41](#_Toc54357409)

[A. Random effects meta-analysis 41](#_Toc54357410)

[B. Funnel plot 42](#_Toc54357411)

[Online Figure 8. Hospital admission in all patients (irrespective of history of hypertension) who had CoViD-19 43](#_Toc54357412)

[A. Random effects meta-analysis 43](#_Toc54357413)

[B. Funnel plot 44](#_Toc54357414)

[Online Figure 9. Severe/critical CoViD-19 in all patients (irrespective of history of hypertension) 45](#_Toc54357415)

[A. Random effects meta-analysis 45](#_Toc54357416)

[B. Funnel plot 46](#_Toc54357417)

[Online Figure 10. ITU admission in all patients (irrespective of history of hypertension) who had CoViD-19 47](#_Toc54357418)

[A. Random effects meta-analysis 47](#_Toc54357419)

[B. Funnel plot 48](#_Toc54357420)

[Online Figure 11. Composite of ITU admission/death in all patients (irrespective of history of hypertension) who had CoViD-19 49](#_Toc54357421)

[Online Figure 12. Mechanical ventilation (or composite of mechanical ventilation/ITU admission/death) in all patients (irrespective of history of hypertension) who had CoViD-19 50](#_Toc54357422)

[A. Random effects meta-analysis 50](#_Toc54357423)

[B. Funnel plot 51](#_Toc54357424)

[Online Figure 13. ECMO in all patients (irrespective of history of hypertension) who had CoViD-19 52](#_Toc54357425)

[Online Figure 14. Case-fatality rate in all patients (irrespective of history of hypertension) who had CoViD-19 53](#_Toc54357426)

[A. Random effects meta-analysis 53](#_Toc54357427)

[B. Funnel plot 54](#_Toc54357428)

[Online References 55](#_Toc54357429)

[Online Appendix 1. Meta-analysis Of Observational Studies in Epidemiology (MOOSE) Checklist 65](#_Toc54357430)

[Online Appendix 2. Electronic Database Search Strategy 66](#_Toc54357431)

[Search terms 66](#_Toc54357432)

This supplementary material has been provided by the authors to give readers additional information about their work.

# Supplemental Tables

## Online Table 1. Selected characteristics of the 92 CoViD-19 observational studies included in qualitative and quantitative analysis

| **Study (author / location)** | **Study design** | **Study setting** | **Data source** | **Patients analysed (number)** | **Patient characteristics** | | **Outcomes** |
| --- | --- | --- | --- | --- | --- | --- | --- |
| **Studies of patients who were tested for SARS-CoV-2** | | | | | | | |
| Trubiano et al1  Australia | Cohort  Single-centre | Hospital  Clinic | EHR | All tested  (n=2,935) | Age (median) 39yrs  Male 37%  HTN 9% | Diabetes 3%  CVD 4%  Chronic renal or liver disease 1% | +ve SARS-CoV-2 test |
| Khider et al2  France | Cohort  Single-centre | Hospital | Administrative | All tested  (n=96) | Age (median) 66yrs (all test +ve n=66), 63yrs (all test -ve n=30)  Male 59%  HTN 49%  Diabetes 17% | CHD 10%  Prior stroke 4%  CKD 13%  BMI (median) 27 kg/m2 (all test +ve), 25 kg/m2 (all test -ve) | +ve SARS-CoV-2 test |
| Dauchet et al3  France (ACER-COVID) | Cohort  Single-centre | Hospital  Outpatients | EHR | HTN tested  (n=105 on antihypertensives, of whom 85 test +ve) | **All tested (n=288):**  Age (mean) 50yrs (outpatients n=139), 58yrs (hospital n=61), 61y (ITU n=88) | Male 62%  Diabetes 14%  CVD 17%  Kidney disease 3% | +ve SARS-CoV-2 test  ITU |
| Reilev et al4  Denmark | Cohort  Multi-centre | Community  Hospital | Registry | All tested  (n=228,677)  HTN tested  (n=48,367 on antihypertensives) | **All test +ve (n=9,519):**  Age (median) 49yrs  Male 42%  HTN 25%  Diabetes 8%  IHD 9%  HF 3%  Prior stroke 5%  Chronic lung diseases 13%  Overweight and obesity 9% | **All test -ve (n=219,158):**  Age (median) 47yrs  Male 37%  HTN 24%  Diabetes 7%  IHD 8%  HF 3%  Prior stroke 5%  Chronic lung diseases 16%  Overweight and obesity 10% | +ve SARS-CoV-2 test |
| All test +ve  (n=9,519)  HTN test +ve  (n=2,147 on antihypertensives) | Hospitalisation  ITU  Death |
| Chang et al5  USA | Case-control  Multi-centre | Community  Hospital | EHR | All tested  (n=24,633) | **All tested (n=26,602):**  Age (mean) 49yrs | Male 44% | +ve SARS-CoV-2 test |
| All tested +ve  (n=843) | **All test +ve (n= 992):**  Age (mean) 49yrs | Male 48% | Hospitalisation |
| All hospitalised  (n=177) | **All hospitalised (n=220):**  Age (mean) 62yrs | Male 56% | Severe* = ITU or Intubation within 14 days of test |
| Shah SJ et al6  USA | Cohort  Single-centre | Hospital | Administrative & EHR | All tested  (n=316) | Age (median) 63yrs (test +ve n=33), 62yrs (test -ve n=283)  Male 52%  HTN 43%  Diabetes 19%  CAD 14% | HF 15%  Prior stroke 8%  COPD 13%  CKD 11%  Obesity 3% | +ve SARS-CoV-2 test |
| Rentsch et al7  USA (USA Veterans Affairs Birth Cohort) | Cohort  Multi-centre | Hospital  Community  Registry | EHR | All tested  (n=3,789 of whom 585 test +ve) | **All tested:**  Age (median) 66yrs  Male 90%  HTN 65%  Diabetes 38% | Vascular disease 29%  COPD 26%  CKD 15%  BMI ≥30kg/m2 41% | +ve SARS-CoV-2 test  Hospitalisation  ITU |
| Reynolds et al8  USA (New York University Langone Health) | Cohort  Multi-centre | Hospital  Community | EHR | All tested  (n=12,594 of whom 5,894 test +ve) | Age (median) 49yrs  Male 42%  Diabetes 18%  Prior MI 4% | HF 6%  Obstructive lung disease 15%  CKD 10%  BMI (median) 27 kg/m2 | +ve SARS-CoV-2 test  Severe = ITU or Ventilation or Death |
| HTN tested  (n=4,357 of whom 2,573 test +ve) | Age (median) 64yrs  Male 51%  Diabetes 40%  Prior MI 11% | HF 16%  Obstructive lung disease 23%  CKD 25%  BMI (median) 29 kg/m2 |
| Mehta et al†9  USA (Cleveland Clinic Health System) | Cohort  Multi-centre | Hospital  Community  Registry | EHR | All tested  (n=18,472 of whom 1,735 test +ve, of whom 1,705 death status known)  HTN tested  (n=7,312 of whom 682 test +ve, of whom 678 death status known) | **All tested:**  Age (mean) 49yrs  Male 40%  Diabetes 19%  CAD 12%  HF 10%  COPD: 12% | **All test +ve:**  Male 50%  Diabetes 19%  CAD 9%  HF 8%  COPD 7% | +ve SARS-CoV-2 test  Hospitalisation  ITU  Ventilation  Death |
| Huh et al10  South Korea | Case-control Multi-centre | Nationwide claims database | Nationwide claims database | All tested  (n=65,149) | Age (mean) 48yrs  Male 49%  HTN 33%  Diabetes 28% | Chronic heart disease 21%  Chronic lung disease 51%  CKD 11% | +ve SARS-CoV-2 test |
| **Study (author / location)** | **Study design** | **Study setting** | **Data source** | **Patients analysed (number)** | **Patient characteristics** | | **Outcomes** |
| **Studies of patients who were tested for SARS-CoV-2, in addition to community controls who were not all tested for SARS-CoV-2** | | | | | | | |
| Dublin et al11  USA | Cohort  Multi-centre | Community  Hospital | EHR | All including community controls who were not tested  (n=322,044) | **All including community controls who were not tested:**  Age (mean) 51yrs  Male 46%  **ACEi/ARB users (n=56,105):**  Age (mean) 66yrs  Male 53%  HTN 72%  Diabetes 34%  Prior MI 7%  HF 6%  COPD 6%  Renal disease 12%  BMI ≥30 kg/m2 52% | **ACEi/ARB non-users (n=265,939):**  Age (mean) 48yrs  Male 45%  HTN 10%  Diabetes 4%  Prior MI 1%  HF 1%  COPD 2%  Renal disease 2%  BMI ≥30 kg/m2 33% | +ve SARS-CoV-2 test‡ |
| All tested +ve  (n=720) | Hospitalisation |
| de Abajo et al12  Spain | Case-control  Multi-centre | Community  Hospital | EHR | All community controls  (n=11,390) | **All test +ve:**  Age (mean) 69yrs  Male 61%  Diabetes 27%  IHD 10% | HF 7%  CVA 6%  COPD 10%  CKD 8% | Hospitalisation‡ |
| All test +ve  (n=1,139)  HTN test +ve  (n=652 on antihypertensives) | ITU or Death |
| Vila-Corcoles et al§13  Spain | Cohort  Multi-centre | Community | CAPAMIS Research Database & EHR | HTN community cohort  (n=34,936 of whom n=855 tested, of whom n=205 test +ve) | **HTN community cohort (n=34,936):**  Male 48%  Diabetes 28% | Cardiac disease 29%  Renal disease 11%  Obesity 41% | +ve SARS-CoV-2 test‡ |
| McKeigue et al§14,15  UK (REACT-SCOT) | Case-control  Multi-centre | Community Hospital | Record linkage to hospital discharges and dispensed prescriptions; national databases (infection, ITU), national register (deaths) | All community controls  (n=34,013 with data)  All test +ve (severe cases)  (n=2,378 with data) | **All community controls (n=36,948):**  T1D 0%  T2D 15%  IHD 15%  Asthma or chronic airway disease 21%  CKD or transplant recipient 1% | **All test +ve (severe cases) (n=4,272):**  T1D 1%  T2D 21%  IHD 21%  Asthma or chronic airway disease 34%  CKD or transplant recipient 2% | Severe*‡ = ITU or Death |
| Raisi-Estabragh et al16  UK (UK Biobank) | Cohort  Multi-centre | Community  Hospital  Registry | Registry | All community controls  (n=494,838)  All tested  (n=7,099) | **All tested:**  Age (mean) 69yrs  Male 50%  HTN 47% | Diabetes 15%  Prior MI 8%  BMI (median) 28 kg/m2 | +ve SARS-CoV-2 test (also ‡) |
| Mancia et al17  Italy | Case-control  Multi-centre | Community  Hospital  Outpatients | National databases | All community controls  (n=30,759) | **All test +ve:**  Age (mean) 68yrs  Male 63%  HTN 58%  Oral antidiabetic drug 14% | CAD 8%  HF 5%  COPD 3%  CKD 3% | +ve SARS-CoV-2 test‡ |
| All test +ve  (n=6,272)  HTN test +ve  (n=3,632 on antihypertensives) | Critical or Fatal = Ventilation or Death |
| Gnavi et al§18  Italy | Nested case-control  Multi-centre | Community | Administrative | HTN community controls  (n=804,909) | Age (mean) 71yrs | Male 59% | +ve SARS-CoV-2 test‡ |
| Fosbøl et al19  Denmark | Nested case-control and cohort  Multi-centre | Community  Hospital | Registry | All community controls  (n=5,710) | **All tested +ve:**  Age (median) 73yrs (ACEi/ARB users n=895), 50yrs (ACEi/ARB non-users n=3585)  Male 48%  HTN 19% | Diabetes 9%  Prior MI 8%  HF 5%  CeVD 9%  PAD 5%  COPD 14%  CKD 4% | +ve SARS-CoV-2 test‡ |
| All tested +ve  (n=4,480) | Severe*  Severe or Death  Death (30-day) |
| Yan et al§20  China | Case-control and cohort  Multi-centre | Community  Hospital | EHR | All community controls  (n=48,667) | **All test +ve:**  Age (mean) 49yrs  Male 51%  HTN 22% | Diabetes 10%  CVD or CeVD 3%  BMI (mean) 24 kg/m2 | +ve SARS-CoV-2 test‡ |
| All test +ve  (n=610) | Severe*‡  Critical*‡ |
| Hippisley-Cox et al§21  UK | Cohort  Multi-centre | Community | QResearch database, linked databases (registry, ITU) | All community cohort (n=8,275,949 of whom 104,665 tested, of whom n=19,486 test +ve) | **All test +ve:**  Age (mean) 62yrs  Male 48%  HTN 39%  T1D 1% | T2D 21%  CVD 18%  HF 6%  COPD 7%  CKD 18% | +ve SARS-CoV-2 test‡  ITU‡ |
| **Study (author / location)** | **Study design** | **Study setting** | **Data source** | **Patients analysed (number)** | **Patient characteristics** | | **Outcomes** |
| **Studies of patients with CoViD-19 (NORTH AMERICA)** | | | | | | | |
| Ebinger et al22  USA (Cedars-Sinai Health System) | Cohort  Multi-centre | Hospital  Community | EHR | All patients  (n=442) | Age (mean) 53yrs  Male 58%  HTN 36%  Diabetes 19% | Prior MI or HF 11%  COPD or asthma 16%  Obesity 16% | Hospitalisation  ITU  Ventilation |
| Shah P et al23  USA (Phoebe Putney Health System) | Cohort  Multi-centre | Hospital | Administrative | All patients  (n=531) | Age (mean) 64yrs (ACEi/ARB users n=207), 58yrs (ACEi/ARB non-users n=324)  Male 41%  HTN 80% | Diabetes 43%  CAD 7%  HF 15%  COPD 8%  CKD 15% | Severe*  Ventilator  ITU  Death |
| Lam et al24  USA | Cohort  Single-centre | Hospital | EHR | HTN  (n=614) | Age (median) 68yrs (ACEi/ARB users n=335), 73yrs (ACEi/ARB non-users n=279)  Male 55% | Diabetes 41%  CHD 24%  HF 13%  COPD 13%  CKD 15% | ITU  Death |
| Nguyen et al25  USA | Cohort  Single-centre | Hospital | Clinical Research Data Warehouse & EHR | All patients  (n=689) | Age (median) 55yrs  Male 43%  HTN 54%  Diabetes 31%  CAD 15% | HF 10%  CeVD/prior stroke 6%  CKD 12%  COPD 9%  BMI >30 kg/m2 57% | Hospitalisation  Death |
| Argenziano et al26  USA | Case series  Single-centre | Hospital | EHR | All patients  (n=1,000) | Age (median) 63yrs  Male 60%  HTN 60%  Diabetes 37%  CAD 13% | HF 10%  Prior stroke 8%  COPD 7%  Renal disease 14%  BMI (median) 29 kg/m2 | ITU |
| Ip et al27  USA (Hackensack Meridian Health network) | Cohort  Multi-centre | Hospital | EHR | HTN  (n=1,129 on antihypertensives) | Age (yrs)  ≤50: 101  51-60: 193 | 61-70: 307  71-80: 292  ≥81: 323 | Death (in-hospital) |
| Richardson et al28  USA | Case series  Multi-centre | Hospital | EHR | HTN  (n=1,366 with data) | **All patients (n=5,700)**:  Age (median) 63yrs  Male 60%  HTN 57%  Diabetes 34%  CAD 11% | HF 7%  COPD 5%  CKD 5%  BMI ≥30 kg/m2 61% | ITU  Ventilation  Death (in-hospital) |
| Kim L et al29  USA (COVID-NET) | Cohort  Multi-centre | Hospital | Multiple databases (laboratory, EHR, hospital discharge records), medical chart reviews | All patients  (n=1,892 with data for ACEi)  (n=1,895 with data for ARB) | **All patients (n=2,491):**  Age (median) 62yrs  Male 53%  HTN 57%  Diabetes 33%  CVD 35% | CAD 14%  HF 11%  COPD 11%  BMI ≥30 kg/m2 50%  BMI ≥40 kg/m2 14%  Renal disease 16% | ITU  Death (in-hospital) |
| Gupta et al30  USA (STOP-COVID) | Cohort  Multi-centre | Hospital (ITU) | EHR | All patients  (n=2,215) | Age (mean) 61yrs  Male 65%  HTN 60%  Diabetes 39%  CAD 13% | HF 9%  COPD 8%  CKD 13%  BMI (median) 31 kg/m2 | Death (28-day) |
| Dashti et al31  USA (Partners HealthCare) | Cohort  Multi-centre | Hospital  Outpatients | EHR & registry | All patients  (n=4,140) | Age (median) 52yrs  Male 44%  HTN 22%  T1D 1% | T2D 11%  Renal failure 6%  Obesity 27% | Hospitalisation  ITU‡  Death |
| Khera et al32  USA (Medicare) | Cohort  Multi-centre | Community | Research database, linked dataset (outpatient testing, inpatient CoViD-19) | HTN (outpatients)  (n=2,263 on antihypertensives) | Age (median) 69yrs  Male 47%  Diabetes without complications 40%  Diabetes, chronic complications 28%  Prior MI 4% | Chronic HF 14%  CeVD 13%  PVD 21%  Chronic pulmonary disease 18%  Renal failure, moderate to severe 16% | Hospitalisation |
| Hospital | HTN (hospitalised)  (n=7933 on antihypertensives) | Age (median) 77yrs  Male 45%  Diabetes without complications 51%  Diabetes, chronic complications 39%  Prior MI 5% | Chronic HF 31%  CeVD 22%  PVD 34%  Chronic pulmonary disease 29%  Renal failure, moderate to severe 30% | Death (in-hospital) |
| Schneeweiss et al33  USA (HealthVerity Inc.) | Cohort  Multi-centre | Community  Hospital | >60 unique data sources including medical claims, pharmacy claims, lab and EHR | HTN  (n=17,137 on antihypertensives with data for ACEi vs. dhpCCB)  (n=15,829 on antihypertensives with data for ARB vs. dhpCCB) | **ACEi vs. dhpCCB (n=17,137):**  Age (mean) 66yrs (ACEi n=8,484), 69yrs (dhpCCB n=8,653)  Male 49%  HTN 37%  T2D 21%  IHD 8%  HF 7%  PVD 5%  Overweight/obese 11% | **ARB vs. dhpCCB (n=15,829):**  Age (mean) 67yrs (ARB n=7,571), 69yrs (dhpCCB n=8,258)  Male 47%  HTN 37%  T2D 20%  IHD 9%  HF 7%  PVD 5%  Overweight/obese 11% | Hospitalisation  Ventilation |
| **Study (author / location)** | **Study design** | **Study setting** | **Data source** | **Patients analysed (number)** | **Patient characteristics** | | **Outcomes** |
| **Studies of patients with CoViD-19 (EUROPE)** | | | | | | | |
| De Spiegeleer et al34  Belgium | Cohort  Multi-centre | Nursing homes | Administrative | All patients  (n=154) | Age (mean) 86yrs  Male 33% | HTN 25%  Diabetes 18% | Hospitalised ≥7 days or Death within 14 days of disease onset |
| Regina et al35  Switzerland | Cohort  Single centre | Hospital | EHR | All patients  (n=200) | Age (median) 70yrs  Male 60%  HTN 44%  Diabetes 22%  CAD 18% | Prior stroke 11%  COPD 8%  CKD 14%  BMI >30 kg/m2 27% | Ventilation (minimum 14 day follow-up) |
| Kormann et al36  France | Cohort  Single-centre | Hospital | EHR | All patients  (n=42) | Age (median) 63yrs  Male 60%  HTN 38%  T2D 29%  CVD 12% | Prior stroke 2%  PAD 5%  COPD 2%  BMI (median) 29 kg/m2 | ITU |
| Villard et al37  France | Case series  Single-centre | Clinic | EHR | All patients  (n=44) | Age (median) 67yrs  Male 61%  HTN 57%  Diabetes 34% | CVD 36%  Prior stroke 11%  CKD 16%  Obesity 25% | Severe* |
| Oussalah et al38  France | Cohort  Single-centre | Hospital | EHR (including Nancy Biochemical Database) | All patients  (n=146 with data on ventilation)  (n=147 with data on death) | **All patients (n=149):**  Age (median) 65yrs  Male 61%  HTN 50%  T2D 29% | CVD 29%  Vascular disease 27%  COPD 11%  CKD 6% | Ventilation  Death (in-hospital) |
| Liabeuf et al39  France | Cohort  Single-centre | Hospital | EHR | All patients  (n=268)  HTN  (n=164 on antihypertensives) | **All patients:**  Age (median) 73yrs  Male 58%  BMI (median) 28 kg/m2  HTN 57%  T1D 3% | T2D 18%  CHD 12%  Prior stroke 14%  Cardiac insufficiency 11%  COPD 10%  CKD 7% | ITU  Death before ITU‡ |
| Holt et al40  Denmark | Cohort  Multi-centre | Hospital | Not specified | All patients  (n=689) | Age (median) 70yrs  Male 58% | Glucose-lowering drugs 17%  Long-acting COPD inhalers 18% | ITU or Death |
| Baker et al41  UK | Cohort  Single-centre | Hospital | EHR | All patients  (n=286 with data) | **All patients (n=316):**  Age (median) 75yrs  Male 55%  HTN 42% | Diabetes 27%  IHD 21%  HF 14%  CKD 24% | Death (28-day) |
| Bean et al42  UK | Cohort  Multi-centre | Hospital | EHR | All patients  (n=1,200) | Age (mean) 68yrs  Male 57%  HTN 54%  Diabetes 35%  IHD 13% | HF 9%  Prior stroke/TIA 20%  COPD 10%  CKD 17%  BMI ≥30 kg/m2 15% | ITU  ITU or Death (21-day)  Death (21-day) |
| Trecarichi et al43  Italy | Cohort  Single-centre | Hospital  Long-term care facility | Administrative | All patients  (n=48 with data) | **All patients (n=50):**  Age (mean) 80yrs  Males 56%  Diabetes 22%  CVD 82% | CVD other than HTN 38%  COPD 18%  CKD 40%  Obesity 10% | Death (in-hospital) |
| Sardu et al44  Italy | Cohort  Multi-centre | Hospital | EHR | HTN  (n=62 on antihypertensives) | Age (mean) 58yrs  Male 66%  Diabetes 26%  CHD 34%  Prior MI 18% | CeVD 11%  COPD 16%  CKD 10%  BMI (mean) 26 kg/m2 | ITU  Ventilation  Death |
| Zangrillo et al45  Italy (COVID-BioB) | Cohort  Single-centre | Hospital (ITU and ventilated) | Administrative | All patients  (n=73)  HTN  (n=36) | **All patients:**  Age (median) 61yrs  Male 84%  HTN 53%  Diabetes 14% | CAD 3%  CeVD 3%  COPD 3%  Moderate/severe CKD 8%  BMI (median) 27 kg/m2 | ECMO‡  Death (in-hospital) |
| Inciardi et al46  Italy | Case series  Single-centre | Hospital | Administrative | All patients  (n=99) | Age (mean) 67yrs  Male 81%  HTN 64%  Diabetes 31%  CAD 16% | HF 21%  COPD 9%  CKD 15%  BMI ≥30 kg/m2 23% | Death (≥ 14-day follow-up) |
| Felice et al47  Italy | Cohort  Single-centre | Hospital | Administrative | HTN  (n=133) | Age (mean) 73yrs (ACEi users n=40), 69yrs (ARB users n=42), 76yrs (ACEi/ARB non-users n=51)  Male 65%  Diabetes 26% | Prior CV events 42%  HF 18%  COPD 11%  BMI (mean) 28 kg/m2 (ACEi users), 28 kg/m2 (ARB users), 26 kg/m2 (ACEi/ARB non-users) | Hospitalisation  ITU  Death |
| Conversano et al48  Italy | Case series  Single-centre | Hospital | EHR | All patients  (n=191)  HTN  (n=96) | **All patients:**  Age (mean) 63yrs  Male 69%  Diabetes 15%  CAD 15%  HF 5%  COPD 5%  CKD 26% | **HTN:**  Age (mean) 71yrs  Male 76%  Diabetes 23%  CAD 28%  HF 8%  COPD 9%  CKD 42% | Death (in-hospital) |
| Giacomelli et al49  Italy | Cohort  Single-centre | Hospital | Administrative | All patients  (n=233) | Age (median) 61yrs  Male 31% | BMI ≥30 kg/m2 16% | Death |
| Parigi et al50  Italy | Cohort  Single-centre | Hospital | Not specified | All patients  (n=325) | Age (median) 66yrs  HTN 51% | CHD 18% | Ventilation |
| Benelli et al51  Italy | Cohort  Single-centre | Hospital | Administrative & EHR | All patients  (n=411) | Age (mean) 67yrs  Male 67%  HTN 47%  Diabetes 16% | CVD 23%  Pulmonary diseases 12%  Renal insufficiency 5% | ITU  Death (within 2 weeks after hospitalisation) |
| Iaccarino et al52  Italy (SARS-RAS) | Cohort  Multi-centre | Hospital | Online questionnaire | All patients  (n=1,591) | Age (mean) 67yrs  Male 64%  HTN 55%  Diabetes 17%  CAD 14% | HF 12%  COPD 8%  CKD 6%  Obesity 6% | Death |
| Bravi et al53  Italy | Case-control  Multi-centre | Community  Hospital | National database of drug prescription, clinical chart, data-linkage (hospital discharge) | All patients  (n=1,603)  HTN  (n=543) | **All patients:**  Age (mean) 58yrs  Male 47%  HTN 34% | Diabetes 12%  Major CVD 16% COPD 6%  Renal disease 5% | Severe = Hospitalisation (Not ITU)  Very severe or lethal = ITU or Death |
| Giorgi Rossi et al54  Italy | Cohort  Multi-centre | Community | SARS-CoV-2 database, data-linkage (local administrative databases) | All patients  (n=2,653) | Age (mean) 63yrs  Male 50%  HTN 18%  Diabetes 12%  Prior MI 7% | HF 6%  COPD 5%  CKD 3%  Obesity 3% | Hospitalisation  Death |
| Golpe et al55  Spain | Cohort  Single-centre | Hospital  Outpatients | EHR & registry | HTN  (n=157) | Age (mean) 70yrs  Male 46%  Diabetes 34% | CVD 23%  CAD 11%  HF 2% | Hospitalisation |
| Jurado et al56  Spain | Cohort  Multi-centre | Hospital | EHR | All patients  (n=302 with data)  HTN  (n=290) | **All patients (n=574):**  Age (mean) 63yrs  Male 59% | HTN 52%  Diabetes 24% | Severe* |
| Hernandez Castilla et al57  Spain | Cohort  Single-centre | Hospital  Primary care | EHR | HTN  (n=318) | Age (median) 77yrs  Male 40%  Diabetes 26%  HF 9% | Prior stroke 7%  Renal insufficiency 10%  COPD 6%  Obesity 28% | Severe*‡  Death‡ |
| Lorente-Ros et al58  Spain | Cohort  Single-centre | Hospital | EHR | All patients  (n=707) | Age (mean) 67yrs  Male 63%  HTN 51% | Diabetes 20%  CKD 11% | Death |
| Martínez-del Río et al59  Spain | Cohort  Single-centre | Hospital | Administrative & EHR | All patients  (n=921) | Age (median) 78yrs  HTN 59%  Diabetes 21%  IHD 8% | HF 8%  COPD 7%  CKD 12%  Obesity 16% | Ventilator  Ventilator or Death  Death |
| López-Otero et al60  Spain (CARDIOVID registry) | Cohort  Single-centre | Community  Hospital | EHR | All patients  (n=965) | **All patients (n=965):**  Age (mean) 60yrs  Male 44%  HTN 31%  Diabetes 13%  CAD 4% | Depressed LVEF 2%  Prior stroke/TIA 3%  PAD 3%  COPD/asthma 9%  Obesity 7% | Hospitalisation‡  Death |
| Hospital | All patients  (n=234) | ITU |
| Poblador-Plou et al61  Spain (PRECOVID) | Cohort  Multi-centre | Community  Hospital | Data-linkage (EHR & administrative) | All patients  (n=4,412) | Age (mean) 68yrs  Male 41%  HTN 34%  Diabetes 12%  Prior MI 2% | HF (nonhypertensive) 4%  Prior TIA 3%  Acute CeVD 3%  COPD and bronchiectasis 3%  CKD 7% | Death (≥30-day) |
| **Study (author / location)** | **Study design** | **Study setting** | **Data source** | **Patients analysed (number)** | **Patient characteristics** | | **Outcomes** |
| **Studies of patients with CoViD-19 (ASIA)** | | | | | | | |
| Selçuk et al62  Turkey | Cohort  Multi-centre | Hospital | EHR | HTN  (n=113 on antihypertensives) | Age (mean) 67yrs (ACEi/ARB users n=74), 58yrs (ACEi/ARB non-users n=39)  Male 52%  Diabetes 42% | CAD 25%  HF 8%  Prior stroke 5%  CKD 12% | ITU  Death (in-hospital) |
| Şenkal et al63  Turkey | Cohort  Single-centre | Hospital | Administrative & EHR (prescriptions) | HTN  (n=248 on antihypertensives) | **All patients (n=611):**  Age (mean) 57yrs  Male 59%  Diabetes 23% | CAD 11%  HF 7%  COPD/asthma 14%  CKD 13% | Severe* = Hospitalisation ≥14 days or ITU or Death |
| Ayed et al64  Kuwait | Cohort  Single-centre | Hospital (ITU) | EHR | All patients  (n=103) | Age (median) 53yrs  Male 85%  HTN 35% | DM 39%  IHD 12%  CKD 4% | Death (in-hospital) |
| Zhou X et al65  China | Cohort  Single-centre | Hospital | Administrative | HTN  (n=36 on antihypertensives) | **All patients (n=110):**  Age (mean) 58yrs  Male 55%  HTN 33%  Diabetes 10%  CVD 9%  CeVD 3%  COPD 3%  CKD 2% | **HTN:**  Age (mean) 65yrs  Male 53% | Death (in-hospital) |
| Meng et al66  China | Cohort  Single-centre | Hospital | EHR | HTN  (n=42 on antihypertensives) | Age (median) 65yrs  Male 57% | T2D 14%  CHD 19% | Severe*  Death (in-hospital) ‡ |
| Huang et al67  China | Cohort  Single-centre | Hospital | HER | HTN  (n=50 on antihypertensives) | Age (mean) 53yrs (ACEi/ARB n=20), 68y (no ACEi/ARB n=30) | Male 54%  Diabetes 8%  CAD 2%  COPD 2% | Severe*  Critical*  Ventilation  ECMO‡  Death (in-hospital) ‡ |
| Liu Y et al68  China | Cohort  Multi-centre | Hospital | Administrative | HTN  (n=61 on antihypertensives) | **HTN (n=78):**  Age (mean) 65yrs | Male 55% | Severe* |
| Feng Z et al69  China | Cohort  Multi-centre | Hospital | EHR | HTN  (n=65 on antihypertensives) | Age (median) 57yrs (ACEi/ARB n=16), 63yrs (no ACEi/ARB n=49)  Male 51%  Diabetes 31% | CVD 12%  CeVD 5%  COPD 2%  CKD 3%  Obesity 17% | Severe* or Critical* |
| Zeng Z et al70  China | Cohort  Single-centre | Hospital | Administrative | HTN  (n=75) | Age (mean) 67yrs  Male 55%  Diabetes 31%  CVD 21% | CeVD 15%  COPD 9%  CKD 5%  BMI (mean) 24 kg/m2 | Severe*  Death (28-day) |
| Ashraf et al§71  Iran | Cohort  Single-centre | Hospital | Administrative | All patients  (n=82) | Age (median) 58yrs  Male 64%  HTN 29% | Diabetes 22%  IHD 16%  COPD 13% | Death (in-hospital) ‡ |
| Feng Y et al72  China | Cohort  Multi-centre | Hospital | Administrative | HTN  (n=95 on antihypertensives) | **All patients (n=476):**  Age (median) 53yrs  Male 57%  Diabetes 10% | CVD 8%  CeVD4%  COPD 5%  Chronic nephropathy 1% | Severe*  Critical* |
| Tan et al73  China | Cohort  Single-centre | Hospital | Not specified | HTN  (n=100) | Age (median) 67yrs (ACEi/ARB users n=31), 68yrs (ACEi/ARB non-users n=69)  Diabetes 28% | CHD 18%  COPD 9%  CKD 9% | Severe*  Critical*  Ventilation  Death‡ |
| Xu et al74  China | Cohort  Single-centre | Hospital | Administrative & EHR | HTN  (n=101 on antihypertensives) | Age (median) 65yrs  Male 52%  Diabetes 19%  CHD 12% | HF 1%  COPD 2%  CKD 2% | ITU  Ventilation  Death (in-hospital) |
| Chen et al75  China | Cohort  Single-centre | Hospital | EHR | All patients  (n=123) | Age (mean) 53yrs (discharged n=92), 72yrs (death n=31)  Male 50%  HTN 33%  Diabetes 11% | CHD 12%  Cardiomyopathy 4%  COPD 5%  CKD 6% | Death (in-hospital) |
| Yang et al76  China | Cohort  Single-centre | Hospital | Administrative & EHR | HTN  (n=126) | Age (median) 66yrs  Male 49%  Diabetes 30% | Cardiomyopathy 18%  Kidney disease 2%  BMI (median) 23 kg/m2 | Severe*  Critical*  Death (in-hospital) |
| Hu et al77  China | Cohort  Multi-centre | Hospital | Not specified | HTN  (n=149) | Age (median) 57yrs  Male 59%  Diabetes 20% | Heart disease 5%  COPD 1%  CKD 4% | Severe*  Critical*  ITU  Ventilation  ECMO  Death‡ |
| Liu X et al78  China | Cohort | Hospital | Administrative & EHR | HTN  (n=157 on antihypertensives) | Age (median) 65yrs (ACEi/ARB n=74), 67yrs (CCB n=83)  Male 46% | Diabetes 27%  CAD 10% | Severe*  Critical* |
| Guo et al79  China | Case series  Single-centre | Hospital | EHR | All patients  (n=187) | Age (mean) 59yrs  Male 49%  HTN 33%  Diabetes 15% | CHD 11%  Cardiomyopathy 4%  COPD 2%  CKD 3% | Death (in-hospital) |
| Pan et al80  China | Cohort  Single-centre | Hospital | EHR | HTN  (n=282) | Age (median) 69yrs  Male 51%  Diabetes 28%  CHD 16% | CeVD 8%  COPD 3%  CKD 5% | ITU  Severe*  Critical*  Death |
| Wang et al81  China | Cohort  Single-centre | Hospital (ITU) | EHR | All patients  (n=344)  HTN  (n=141) | **All patients:**  Age (median) 64yrs  Male 52%  HTN 41% | Diabetes 19%  CVD 12%  COPD 5% | Death (28-day) |
| Li J et al82  China | Case series  Single-centre | Hospital | Administrative | HTN  (n=362) | Age (median) 66yrs  Male 52%  Diabetes 35%  CHD 17% | HF 3%  CeVD 19%  CKD 10% | Severe*  Death (in-hospital) |
| Li X et al83  China | Cohort  Single-centre | Hospital | Administrative & EHR | All patients  (n=545 with data) | **All patients (n=548):**  Age (median) 60yrs  Male 51%  HTN 30%  Diabetes 15% | CHD 6%  COPD 3%  CKD 2%  BMI (median) 25 kg/m2 | Severe* |
| Gao et al84  China | Cohort  Single-centre | Hospital | EHR | HTN  (n=710 on antihypertensives) | Age (mean) 64yrs  Male 52%  Diabetes 27%  Prior MI 0.4%  HF 1% | Prior stroke 4%  PVD 0.3%  COPD 1%  Renal failure 2% | Severe* (China + WHO)  Critical* (China + WHO)  Ventilation  Death |
| Zhou J et al85  China | Cohort  Multi-centre | Hospital | EHR | All patients  (n=976 with data) | **All patients (n=1,043):**  Age (median) 34yrs  Male 54%  HTN 20% | Diabetes 10%  CVD 2%  CKD 4% | ITU |
| Zeng H et al86  China | Cohort  Single-centre | Hospital | EHR | All patients  (n=1,031) | Age (mean) 60yrs  Male 52%  HTN 37%  Diabetes 18% | CHD 8%  Prior stroke 2%  COPD 4% | Death (in-hospital) |
| Zhang et al87  China | Cohort  Multi-centre | Hospital | Administrative & EHR | HTN  (n=1,128) | Age (median) 64yrs  Male 53% Diabetes 21%  CHD 12% | CeVD 4%  COPD 1%  CKD 3% | Ventilation  ECMO‡  Death (28-day) |
| Hwang et al88  South Korea | Cohort  Multi-centre | Hospital | EHR | All patients  (n=103) | Age (mean) 68yrs  Male 50%  HTN 55%  Diabetes 34% | CVD 12%  Prior stroke 4%  CKD 17% | Death (in-hospital) |
| Kim JH et al89  South Korea | Cohort  Multi-centre | Community  Hospital | Nationwide claims database | HTN  (n=1,290) | Age (mean) 62yrs  Male 52%  Diabetes 32%  CAD 12%  HF 8% | Prior stroke 11%  PVD 9%  COPD 22%  CKD 17% | ITU or Ventilator or Death or Sepsis  Death |
| Choi et al90  South Korea | Case-control  Multi-centre | Community  Hospital | Nationwide claims database | HTN  (n=1,320 on antihypertensives) | Age (mean) 65yrs (ACEi/ARB users n=892), 71yrs (ACEi/ARB non-users n=428) | Male 42%  Diabetes 45% | Severe* or Death  ITU  Ventilation  ECMO |
| Jung S-Y et al91  South Korea (Korean Health Insurance Review and Assessment database) | Cohort  Multi-centre | Community  Hospital | Nationwide claims database | All patients  (n=5,179)  All patients hospitalised  (n=1,954) | **All patients (n=5,179):**  Age (mean) 45yrs  Male 44%  HTN 22% Diabetes 17% | Prior MI 1%  HF 4%  CeVD 6%  Chronic pulmonary disease 28%  CKD 5% | Hospitalisation  Ventilation  ECMO  Death (in-hospital) |
| Lee et al92  South Korea | Cohort  Multi-centre | Community  Hospital | Nationwide administrative & claims database | All patients  (n=8,266) | Age (mean) 44yrs  Male 38%  HTN 19%  Diabetes 17%  CAD 6% | HF 1%  Prior stroke 3%  COPD 14%  CKD 1% | Death (60-days) |
| **Study (author / location)** | **Study design** | **Study setting** | **Data source** | **Patients analysed (number)** | **Patient characteristics** | | **Outcomes** |
| **Studies of patients with CoViD-19 (INTERNATIONAL)** | | | | | | | |
| Jung C et al93  International (COVIP) | Cohort  Multi-centre | Hospital (ITU) | Not specified (prospective) | All patients  (n=324) | Age (median) 75yrs  Male 69%  HTN 65%  Diabetes 29% | IHD 20%  HF 14%  Renal insufficiency 15%  BMI (median) 27 kg/m2 | Death (30-day) |

Abbreviations: ACEi, angiotensin-converting enzyme inhibitor; ARB, angiotensin-receptor blocker; BMI, body mass index; CAD, coronary artery disease; CCB, calcium channel blocker; CeVD, cerebrovascular disease; CHD, coronary heart disease; CKD, chronic kidney disease; COPD, chronic obstructive pulmonary disease; CoViD-19, coronavirus disease 2019; CVA, cerebrovascular accident; CVD, cardiovascular disease; dhpCCB, dihydropyridine calcium channel blocker; ECMO, extracorporeal membrane oxygenation; EHR, electronic health record; HF, heart failure; HTN, hypertension; ICD-10, International Classification of Diseases, 10th Revision; IHD, ischemic heart disease; ITU, intensive therapy unit; LVEF, left ventricular ejection fraction; MI, myocardial infarction; PVD, peripheral vascular disease; SARS-CoV-2, severe acute respiratory syndrome-coronavirus-2; T1D, type 1 diabetes; T2D, type 2 diabetes; TIA, transient ischemic attack; UK, United Kingdom; USA, United States of America; WHO, World Health Organization.

All studies were published in the year 2020.

Demographics (age, sex) and comorbidities (HTN, diabetes, CAD/CHD/CVD/IHD/MI, cardiomyopathy/HF, CeVD/CVA/TIA, PVD, COPD, CKD, BMI/obesity) are listed if available from manuscript.

HTN patients included those with and without antihypertensives (unless otherwise stated).

* Definitions of Severe and Critical:

Chang (severe = ITU/intubation within 14 days of SARS-CoV-2 test).

Choi (severe = respiratory failure requiring mechanical ventilation, organ failure requiring ITU, organ failure requiring continuous renal-replacement therapy, organ failure requiring ECMO).

Feng Y, Feng Z, Gao, Huang, Liu X, Liu Y, Meng, Pan, Yan, Yang (severe = respiratory distress (≥30 breaths/minute), oxygen saturation ≤ 93% at rest, arterial partial pressure of oxygen (PaO2)/fraction of inspired oxygen (FiO2) ≤300 mmHg, and/or lung infiltrates >50% within 24-48 hours as per Diagnosis and Treatment Protocol for Novel Coronavirus Pneumonia from National Health Commission of China).94

Feng Y, Feng Z, Gao, Huang, Pan, Yan, Yang (critical = respiratory failure requiring mechanical ventilation, shock, and/or organ failure requiring ITU as per Diagnosis and Treatment Protocol for Novel Coronavirus Pneumonia from National Health Commission of China).94

Fosbøl (severe = ICD-10 code B972A or ITU admission).

Hernandez Castilla (severe = respiratory frequency ≥30/min, blood oxygen saturation levels ≤93%, lung infiltrates >50%, septic shock, pulmonary thromboembolism, ITU stay, and/or multiple organ dysfunction or failure).

Hu (severe = severe pneumonia, respiratory rate >30 breaths/minute, oxygen saturation <90% on room air as per WHO interim guidance).95

Hu (critical = acute respiratory distress syndrome, sepsis, septic shock as per WHO interim guidance).95

Jurado (severe = acute respiratory distress, shock, admission to ITU, or the process was so considered by physician in charge, any “exitus” as well classified as severe).

Li J (severe = severe as per Feng Y plus critical as per Feng Y).

Li X and Zeng Z (severe pneumonia = as per American Thoracic Society and Infectious Diseases Society of America).96

McKeigue (severe = +ve SARS-CoV-2 test followed by ITU or Death within 28 days; or death certificate with CoViD-19 as underlying cause).

Şenkal (severe = hospitalisation ≥14 days / ITU / death).

Shah P (severe = septic shock, severe pneumonia, and/or acute respiratory distress syndrome on presentation).

Tan (severe and critical definition not specified in manuscript).

Villard (severe = ordinal scale of ≥5 on a seven-category ordinal scale: 1 – not hospitalised, no limitation on activities; 2 – not hospitalised, limitations on activities; 3 – hospitalised, not requiring supplemental oxygen; 4 – hospitalised, requiring supplemental oxygen; 5 – hospitalised, on non-invasive ventilation or high flow oxygen devices; 6 – hospitalised, on invasive mechanical ventilation or ECMO; 7 - death).

† Previously unpublished data has been provided by Mehta et al:

Previously published data:

HTN and all patients: likelihood of +ve SARS-CoV-2 test: ACEi vs. no ACEi, ARB vs. no ARB

All patients: case-fatality rate: ACEi/ARB vs. no ACEi/ARB

Previously unpublished data:

HTN and all patients: likelihood of +ve SARS-CoV-2 test: ACEi/ARB vs. no ACEi/ARB

HTN and all patients: hospitalisation, ITU, ventilator: ACEi/ARB vs. no ACEi/ARB, ACEi vs. no ACEi, ARB vs. no ARB

HTN: case-fatality rate: ACEi/ARB vs. no ACEi/ARB, ACEi vs. no ACEi, ARB vs. no ARB

All patients: case-fatality rate: ACEi vs. no ACEi, ARB vs. no ARB

‡ Outcomes excluded from quantitative analysis (and reasons):

Ashraf, Meng, Hu, Huang, Tan (death: zero count events).

Dashti (ITU: mutually exclusive from in-hospital death, possibility of selection bias).

de Abajo (hospitalisation: not all community controls were tested for SARS-CoV-2).

Dublin, Fosbøl, Gnavi, Mancia, Raisi-Estabragh, Vila-Corcoles, Yan (+ve SARS-CoV-2 test: not all community controls were tested).

Hernandez-Castilla (death and severe: discrepancy between two sets of raw numbers from manuscript for ACEi vs. no ACEi).

Hippisley-Cox (+ve SARS-CoV-2 test, ITU: not all community controls were tested).

Huang, Zangrillo, Zhang (ECMO: zero count events).

Liabeuf (death before ITU: possibility of selection bias).

López-Otero (hospitalisation: discrepancy between two sets of raw numbers from manuscript for ACEi/ARB vs. no ACEi/ARB, ACEi vs. no ACEi, ARB vs. no ARB).

McKeigue (severe: not all community controls were tested).

Yan (+ve SARS-CoV-2 test, severe, critical: only % available without raw numbers).

§ Studies only in qualitative analysis (reasons as above):

Ashraf, Gnavi, Hippisley-Cox, McKeigue, Vila-Corcoles, Yan.

## Online Table 2. Larger (N ≥500) randomised controlled trials with renin-angiotensin system blockers

| **Study** | **N** | **Design** | **Blind** | **Intervention** | **Patients/outcome** |
| --- | --- | --- | --- | --- | --- |
| **ACEi/ARB** | | | | | |
| COVID-RASi  NCT04591210 | 1155 | Parallel group | Yes | ACEi, ARB, none | High-risk older patients. Ventilation/ITU/death 28d. Hospitalisation/ITU/ventilation 1yr. |
| BRACE-CORONA  NCT04364893 | 659 | Parallel group | No | continuing vs. suspending ACEi/ARB | Hospitalised patients on ACEi/ARB. Days alive and out of hospital 30d. |
| ACORES-2  NCT04329195 | 554 | Parallel group | No | discontinuation vs continuation of RAS blocker | Hospitalised (non-ITU) patients on ACEi/ARB. ITU/ventilation/death 28d. |
| **ACEi** | | | | | |
| RAMIC  NCT04366050 | 560 | Parallel group | Yes | **ramipril**, placebo | Hospitalised/emergency department patients. ITU/ventilation/death 14d. |
| **ARB** | | | | | |
| CRASH-19  NCT04343001 | 10,000 | Factorial 2X2X2 | No | **losartan**, aspirin, simvastatin, none | Hospitalised patients. Ventilation/death 28d. |
| COVID MED  NCT04328012 | 4,000 | Parallel group 2:2:2:1 | Yes | lopinavir/ritonavir, **losartan**, placebo | Hospitalised patients. Severity/LOS/ITU, ventilation/death 60d. |
| FMTVDM  NCT04349410 | 1,800 | Factorial  11 arms | Yes | hydroxychloroquine, azithromycin, doxycycline, clindamycin, primaquine, remdesivir, tocilizumab, methylprednisolone, interferon-alpha2b, **losartan**, convalescent serum | All CoViD-19 positive. Ventilation 7d. Death 30d. |
| COVID-Aging  NCT04359953 | 1,600 | Parallel group | No | hydroxychloroquine, azithromycin, **telmisartan**, none | Older hospitalised patients. Ventilation 28d. Death 14d. |
| PRAETORIAN-COVID  NCT04335786 | 651 | Parallel group | Yes | **valsartan**, placebo | Hospitalised patients. ITU/ventilation/death 14d. Death 14d/30d/90d/1yr. |
| CLARITY  NCT04394117 | 605 | Parallel group | Yes | **ARB**, none | Hospitalised and non-hospitalised patients. Hospitalisation/ITU/death 15d/28d/90d. Ventilation 15d/28d. |
| NCT04311177 | 580 | Parallel group | Yes | **losartan**, placebo | Non-hospitalised patients. Hospitalisation 15d. Severity 7d/15d/28d. Ventilation 28d. |
| ACOVACT  NCT04351724 | 500 | Parallel group, 3 arms, 3 substudies | No | chloroquine/hydroxychloroquine, lopinavir/ritonavir, none, rivaroxaban, thromboprophylaxis, **candesartan**, non-RAS blocking antihypertensives, clazakizumab, placebo | Hospitalised patients. Hospitalisation/LOS/ventilation/ECMO/death 29d. |

NCT indicates Clinicaltrials.gov registration number.

Abbreviations: ACEi, angiotensin-converting enzyme inhibitor; ARB, angiotensin receptor blocker; CoViD-19, coronavirus disease 2019; ECMO, extracorporeal membrane oxygenation; ITU, intensive therapy unit; LOS, length of stay; RAS, renin-angiotensin system.

# Supplemental Results (Quantitative Analyses)

The following text describes the results of the quantitative analyses in all patients (irrespective of history of hypertension) reported in the studies included in the meta-analysis.

## Likelihood of a Positive SARS-COV-2 Test

Across 11 studies, a total of 363,865 patients had SARS-CoV-2 testing, with no difference in the proportion of patients testing positive in the various treatment groups: 4,460/52,021 (8.6%) positive in the ACE inhibitor/ARB group vs. 21,019/311,844 (6.7%) in the no ACE inhibitor/ARB group (OR 1.14, 0.93-1.41) (**Online Figure 7A**). In these 11 studies with ACE inhibitor/ARB data, a funnel plot was performed to assess for publication bias (**Online Figure 7B**) and Egger’s test showed weak evidence for presence of small-study effects (estimated bias coefficient 0.237, standard error 2.173, p Value = 0.916). Seven studies reported ACE inhibitor vs. no ACE inhibitor and ARB vs. no ARB separately (OR 1.08, 0.83-1.40 and OR 1.08, 0.80-1.46 respectively) (**Online Figure 7A**).

## Severe Outcomes in CoViD-19

**Hospitalisation:** Fifteen studies including a total of 31,661 patients reported hospitalisation in 3,376/7,416 (45.5%) patients treated with an ACE inhibitor/ARB, compared with 6,583/24,245 (27.2%) patients not taking an ACE inhibitor/ARB (OR 2.17, 1.62-2.89) (**Online Figure 8A**). In the 15 studies with ACE inhibitor/ARB data, a funnel plot was performed to assess for publication bias (**Online Figure 8B**) and Egger’s test showed weak evidence for presence of small-study effects (estimated bias coefficient –3.371, standard error 2.111, p Value = 0.134). Twelve studies with 32,380 patients reported data on ACE inhibitor vs. no ACE inhibitor separately (OR 1.95, 1.29-2.95), whilst 12 studies including 31,072 patients reported data on ARB vs. no ARB separately (OR 1.57, 1.07-2.31) (**Online Figure 8A**).

**Hospitalisation/Death:** One study from Belgium with a total 154 elderly patients reported the composite outcome of hospitalisation/death in 6/30 (20.0%) of patients taking an ACE inhibitor/ARB compared with 31/124 (25.0%) of those not taking an ACE inhibitor/ARB (OR 0.75, 0.28-2.00).34

**Severe/Critical CoViD-19:** Eighteen studies including a total of 8,176 patients reported severe/critical CoViD-19 (as distinct from ITU/ventilation/death), showing 699/2,039 (34.3%) events in patients treated with an ACE inhibitor/ARB compared with 1,596/6,137 (26.0%) events in patients not treated with an ACE inhibitor/ARB (OR 0.88, 0.63-1.24) (**Online Figure 9A**). In these 18 studies with ACE inhibitor/ARB data, a funnel plot was performed to assess for publication bias (**Online Figure 9B**) and Egger’s test showed some evidence for presence of small-study effects (estimated bias coefficient -2.987, standard error 0.630, p Value = <0.001). Six studies with 5,752 patients reported data for ACE inhibitor vs. no ACE inhibitor separately (OR 1.41, 0.86-2.33), whilst 7 studies with 6,070 patients reported data for ARB vs. no ARB separately OR 0.95, 0.65-1.39) (**Online Figure 9A**).

**Severe/Death:** Two studies reported the composite outcome of severe CoViD-19 or death in 369/1,787 (20.6%) patients treated with an ACE inhibitor/ARB, compared with 621/4,013 (15.5%) patients not treated with these drugs (OR 0.97, 0.12-7.91).19,90

**Admission to ITU:** Twenty two studies including a total of 21,168 patients reported admission to ITU with 795/5,388 (14.8%) patients on an ACE inhibitor/ARB admitted, compared with 1,180/15,780 (7.5%) not taking an ACE inhibitor/ARB admitted to ITU (OR 1.42, 0.99-2.03) (**Online Figure 10A**). In these 22 studies with ACE inhibitor/ARB data, a funnel plot was performed to assess for publication bias (**Online Figure 10B**) and Egger’s test showed weak evidence for presence of small-study effects (estimated bias coefficient –1.551, standard error 1.463, p Value = 0.302). Twelve studies with 7,518 patients reported ACE inhibitor vs. no ACE inhibitor data separately (OR 1.29, 0.91-1.84), whilst 12 studies with 7,521 patients reported ARB vs. no ARB data separately (OR 1.51, 1.22-1.87) (**Online Figure 10A**).

**ITU/Death:** Five studies including 4,879 patients reported the composite outcome of admission to ITU or death, with this outcome occurring in 542/1,716 (31.6%) patients treated with an ACE inhibitor/ARB, compared with 709/3163 (22.4%) patients not treated with these drugs (OR 1.28, 0.69-2.37) (**Online Figure 11**).

**ITU/Ventilation/Death:** Twenty one studies including a total of 24,873 patients reported the use of mechanical ventilation (or a composite including 2 or more of ITU/ventilation/death), with 1,159/8,332 (13.9%) patients on ACE inhibitor/ARB treatment experiencing an event compared with 1,695/16,541 (10.2%) not taking ACE inhibitor/ARB treatment (OR 1.23, 1.00-1.52) (**Online Figure 12A**). In these 21 studies with ACE inhibitor/ARB data, a funnel plot was performed to assess for publication bias (**Online Figure 12B**) and Egger’s test showed some evidence for presence of small-study effects (estimated bias coefficient –1.797, standard error 0.563, p Value = 0.005). Data for ACE inhibitors and ARBs were reported separately in 11 studies including 35,247 and 33,939 patients respectively (OR of 1.40, 1.16-1.69 and OR of 1.31, 1.06-1.62 respectively) (**Online Figure 12A**).

**Extracorporeal membrane oxygenation:** Of 6 studies reporting use of extracorporeal membrane oxygenation, three studies had zero count events and were not quantitatively analysed.45,67,87 The remaining 3 studies of 3,423 patients showed that this event occurred in 9/1,334 (0.7%) patients on ACE inhibitor/ARB treatment vs. 6/2,089 (0.3%) of patients not on ACE inhibitor/ARB treatment (OR 1.73, 0.55-5.43) (**Online Figure 13**).

## Case-Fatality in CoViD-19 Patients

Forty nine studies including a total of 66,991 patients reported case-fatality. In 46 studies of 64,649 patients, 3,047/18,035 (16.9%) patients taking an ACE inhibitor/ARB died, compared with 4,415/46,614 (9.5%) not taking an ACE inhibitor/ARB (OR 1.35, 1.11-1.65) (**Online Figure 14A**). In these 46 studies with ACE inhibitor/ARB data, a funnel plot was performed to assess for publication bias (**Online Figure 14B**) and Egger’s test showed weak evidence for presence of small-study effects (estimated bias coefficient –0.876, standard error 0.766, p Value = 0.259). Twenty six studies including 46,277 patients provided data on ACE inhibitors separately, whilst 25 studies including 46,151 patients provided data on ARBs separately, with an OR for death with an ACE inhibitor (vs. no ACE inhibitor) of 1.39, 1.13-1.71) and for an ARB (vs. no ARB) of 1.41, 1.16-1.71) (**Online Figure 14A**). Five additional studies reported case-fatality but were excluded from quantitative analysis, as they had zero count events in the ACE inhibitor/ARB groups.66,67,71,73,77

# Supplemental Results (Qualitative Analyses)

The following text describes the results of the qualitative analyses reported in the studies which were not included in the meta-analysis.

## Susceptibility to SARS-CoV-2 infection

Eight additional relevant and large studies reported likelihood of a positive test for SARS-CoV-2 but were not included in our meta-analysis because they included population controls who did not undergo testing for SARS-CoV-2. Of these, 4 studies did not show an association between use of renin-angiotensin system blockers and the likelihood of a positive test for SARS-CoV-2 in multivariable adjusted analyses - 571 cases and 5,710 matched population controls from Denmark, 720 cases and 321,324 population controls from the United States, 1,439 cases and 494,838 population controls from the UK Biobank and 6,272 cases and 30,759 population controls from northern Italy.11,16,17,19 The Italian study also showed no difference in susceptibility to infection with either an ACE inhibitor or ARB.17 Another 2 studies included population-based cohorts with hypertension - 205 cases and 34,731 population controls from Spain and 316 cases and 1,580 matched population controls from Italy - and did not find an increased risk of SARS-CoV-2 infection with either an ACE inhibitor and/or an ARB.13,18 In a further Chinese study including 610 cases and 48,667 population controls, use of an ARB, but not an ACE inhibitor, was associated with a lower risk of acquiring SARS-CoV-2 infection in a multivariable analysis.20 In a UK study with 19,486 cases and 8,256,463 population controls, treatment with either an ACE inhibitor or ARB was associated with a reduced risk of CoViD-19 disease in adjusted analyses.21

## Severity of CoViD-19 and case-fatality rate

In a large case-series from New York city, Reynolds and colleagues carried out propensity-score matching of patients with hypertension treated and not treated with a renin-angiotensin system blocker.8 In that analysis, the risk of severe CoViD-19 (defined as ITU admission, ventilation or death) was not different between the two matched groups, with approximately 250 events in each group. A Scottish study including 2,378 cases and 34,013 matched population controls reported a lower risk of severe CoViD-19 (defined as a positive SARS-CoV-2 test followed by ITU / death within 28 days, or death certificate with CoViD-19 as underlying cause) in ACE inhibitor/ARB users, in multivariable analyses.14

# Supplemental Discussion

## Genetics

The underlying basis of the concern about the use of renin-angiotensin system blockers and SARS-CoV-2 infection and CoViD-19 is not supported by genetic studies.97–99 To date, genetic determination of ACE-2 expression, or expression of other relevant host factors, have not been shown to be associated with infection rate or outcome, although further exploration of genetic susceptibility is underway (The COVID-19 Host Genetics Initiative).99

# Supplemental Figures

## Online Central Figure.


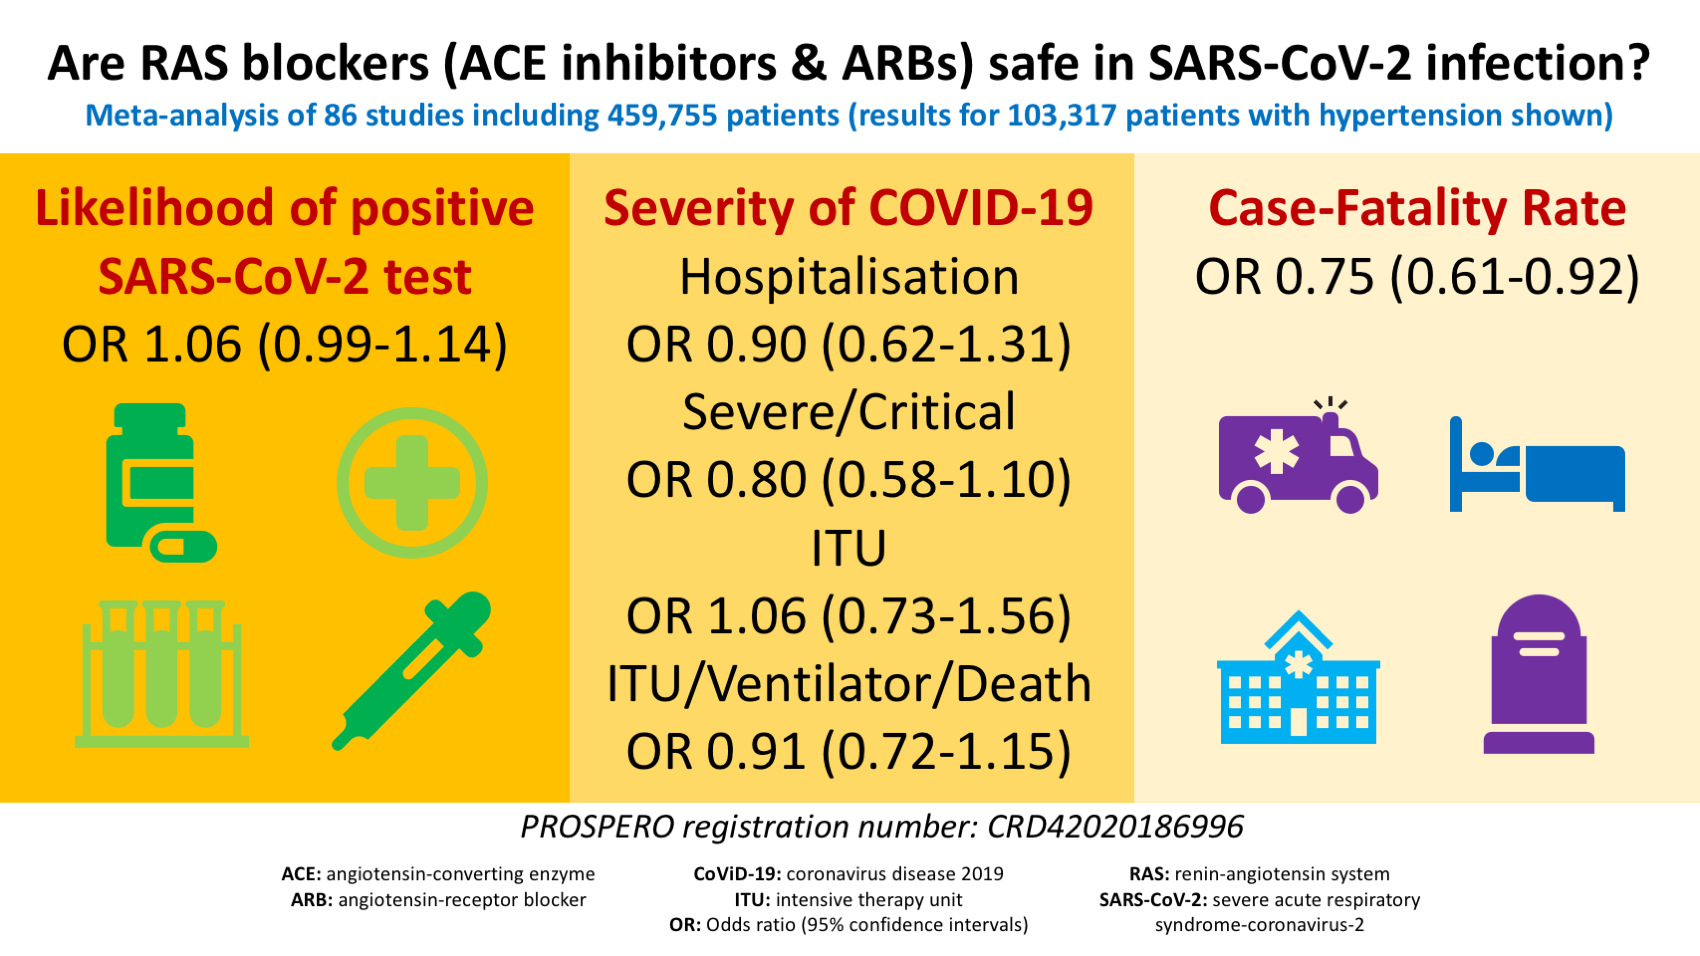


## Online Figure 1. Risk of bias assessment (ROBINS-I tool) for 11 studies reporting likelihood of positive SARS-CoV-2 test

Abbreviations: ROBINS-I, Risk Of Bias In Non-randomized Studies – of Interventions; SARS-CoV-2, severe acute respiratory syndrome-coronavirus-2.

## Online Figure 2. Risk of bias assessment (ROBINS-I tool) for 61 studies reporting the severity of CoViD-19

Abbreviations: CoViD-19, coronavirus disease 2019; ROBINS-I, Risk Of Bias In Non-randomized Studies – of Interventions. Studies with zero count events were excluded.

## Online Figure 3. Risk of bias assessment (ROBINS-I tool) for 49 studies reporting case-fatality rate in CoViD-19

Abbreviations: CoViD-19, coronavirus disease 2019; ROBINS-I, Risk Of Bias In Non-randomized Studies – of Interventions. Studies with zero count events were excluded.

## Online Figure 4. Sensitivity analysis (tipping-point analysis) for case-fatality rate in patients with history of hypertension who had CoViD-19

### Eight additional studies (each with odds ratio of 6.30) do not tip the results

### Nine additional studies (each with odds ratio of 6.30) would be required to tip the results

### One additional study (even with an extreme odds ratio of 13.56) does not tip the results

Abbreviations: ACEi, angiotensin-converting enzyme inhibitor; ARB, angiotensin-receptor blocker; CoViD-19, coronavirus disease 2019; USA, United States of America.

All studies were published in the year 2020. Studies with zero count events were excluded. Mehta (includes previously unpublished data from authors).

## Online Figure 5. Sensitivity analysis (peer-reviewed vs. preprint articles) in patients with history of hypertension

### Likelihood of positive SARS-CoV-2 test in patients who were tested

### Hospital admission in patients who had CoViD-19

### Severe/critical CoViD-19

### Admission to ITU in patients who had CoViD-19

### Composite of mechanical ventilation/ITU/death in patients who had CoViD-19

### Case-fatality rate in patients who had CoViD-19

Abbreviations: ACEi, angiotensin-converting enzyme inhibitor; ARB, angiotensin-receptor blocker; CoViD-19, coronavirus disease 2019; ITU, intensive therapy unit; SARS-CoV-2, severe acute respiratory syndrome-coronavirus-2; USA, United States of America.

All studies were published in the year 2020. Definitions of severe and critical are detailed in Online Table 1 footnote. Dauchet, Golpe and Mancia (ACEi/ARB numbers manually calculated with assumption that no patients used ACEi and ARB at the same time). Mancia (critical/fatal = ventilator/death). Mehta (includes previously unpublished data from authors). Reynolds (severe outcome = ITU/ventilator/death).

## Online Figure 6. Sensitivity analysis (by continent) in patients with history of hypertension

### Likelihood of positive SARS-CoV-2 test in patients who were tested

### Hospital admission in patients who had CoViD-19

### Severe/critical CoViD-19

### Admission to ITU in patients who had CoViD-19

### Composite of mechanical ventilation/ITU/death in patients who had CoViD-19

### Case-fatality rate in patients who had CoViD-19

Abbreviations: ACEi, angiotensin-converting enzyme inhibitor; ARB, angiotensin-receptor blocker; CoViD-19, coronavirus disease 2019; ITU, intensive therapy unit; SARS-CoV-2, severe acute respiratory syndrome-coronavirus-2; USA, United States of America.

All studies were published in the year 2020. Definitions of severe and critical are detailed in Online Table 1 footnote. Dauchet, Golpe and Mancia (ACEi/ARB numbers manually calculated with assumption that no patients used ACEi and ARB at the same time). Mancia (critical/fatal = ventilator/death). Mehta (includes previously unpublished data from authors). Reynolds (severe outcome = ITU/ventilator/death).

## Online Figure 7. Likelihood of positive SARS-CoV-2 test in all patients (irrespective of history of hypertension) who were tested

### Random effects meta-analysis

Abbreviations: ACEi, angiotensin-converting enzyme inhibitor; ARB, angiotensin-receptor blocker; HTN, hypertension; SARS-CoV-2, severe acute respiratory syndrome-coronavirus-2; UK, United Kingdom; USA, United States of America.

All studies were published in the year 2020. Chang, Dauchet, Huh and Raisi-Estabragh (ACEi/ARB numbers manually calculated with assumption that no patients used ACEi and ARB at the same time). Mehta (includes previously unpublished data from authors).

### Funnel plot

Egger’s test for small-study effects (11 studies): estimated bias coefficient 0.237, standard error 2.173, p Value = 0.916.

## Online Figure 8. Hospital admission in all patients (irrespective of history of hypertension) who had CoViD-19

### Random effects meta-analysis

Abbreviations: ACEi, angiotensin-converting enzyme inhibitor; ARB, angiotensin-receptor blocker; CoViD-19, coronavirus disease 2019; HTN, hypertension; ITU, intensive therapy unit; USA, United States of America.

All studies were published in the year 2020. Argenziano (includes non-ITU and ITU). Bravi (severe outcome = hospitalisation (not ITU)) (raw numbers were back-calculated from %). Chang, Dashti, Ebinger, Giorgi Rossi, Golpe and Nguyen (ACEi/ARB numbers manually calculated with assumption that no patients used ACEi and ARB at the same time). Dashti (includes non-ITU, ITU and in-hospital death). Mehta (includes previously unpublished data from authors).

### Funnel plot

Egger’s test for small-study effects (15 studies): estimated bias coefficient -3.371, standard error 2.111, p Value = 0.134.

## Online Figure 9. Severe/critical CoViD-19 in all patients (irrespective of history of hypertension)

### Random effects meta-analysis

Abbreviations: ACEi, angiotensin-converting enzyme inhibitor; ARB, angiotensin-receptor blocker; CoViD-19, coronavirus disease 2019; HTN, hypertension.

All studies were published in the year 2020. Definitions of severe and critical are detailed in Online Table 1 footnote. Liu Y (ACEi/ARB numbers manually calculated with assumption that no patients used ACEi and ARB at the same time).

### Funnel plot

Egger’s test for small-study effects (18 studies): estimated bias coefficient -2.987, standard error 0.630, p Value = <0.001.

## Online Figure 10. ITU admission in all patients (irrespective of history of hypertension) who had CoViD-19

### Random effects meta-analysis

Abbreviations: ACEi, angiotensin-converting enzyme inhibitor; ARB, angiotensin-receptor blocker; CoViD-19, coronavirus disease 2019; HTN, hypertension; ITU, intensive therapy unit; UK, United Kingdom; USA, United States of America.

All studies were published in the year 2020. Benelli, Dauchet, Ebinger and Kormann (ACEi/ARB numbers manually calculated with assumption that no patients used ACEi and ARB at the same time). Mehta (includes previously unpublished data from authors).

### Funnel plot

Egger’s test for small-study effects (22 studies): estimated bias coefficient -1.551, standard error 1.463, p Value = 0.302.

## Online Figure 11. Composite of ITU admission/death in all patients (irrespective of history of hypertension) who had CoViD-19

#### Random effects meta-analysis

Abbreviations: ACEi, angiotensin-converting enzyme inhibitor; ARB, angiotensin-receptor blocker; CoViD-19, coronavirus disease 2019; ITU, intensive therapy unit; UK, United Kingdom.

All studies were published in the year 2020. Bravi (very severe/lethal outcome = ITU/death) (raw numbers were back-calculated from %). de Abajo (ACEi/ARB numbers manually calculated with assumption that no patients used ACEi and ARB at the same time). Şenkal (severe outcome = hospitalisation ≥14 days / ITU / death).

## Online Figure 12. Mechanical ventilation (or composite of mechanical ventilation/ITU admission/death) in all patients (irrespective of history of hypertension) who had CoViD-19

### Random effects meta-analysis

Abbreviations: ACEi, angiotensin-converting enzyme inhibitor; ARB, angiotensin-receptor blocker; CoViD-19, coronavirus disease 2019; HTN, hypertension; ITU, intensive therapy unit; USA, United States of America.

All studies were published in the year 2020. Chang, Ebinger and Mancia (ACEi/ARB numbers manually calculated with assumption that no patients used ACEi and ARB at the same time). Chang (severe outcome = ITU/intubation within 14 days of SARS-CoV-2 test = analysed as ITU/ventilator). Kim JH (ITU/ventilator/death/sepsis). Mancia (critical/fatal = ventilator/death). Mehta (includes previously unpublished data from authors). Parigi (raw numbers were back-calculated from %). Reynolds (severe outcome = ITU/ventilator/death).

### Funnel plot

Egger’s test for small-study effects (21 studies): estimated bias coefficient -1.797, standard error 0.563, p Value = 0.005.

## Online Figure 13. ECMO in all patients (irrespective of history of hypertension) who had CoViD-19

#### Random effects meta-analysis

Abbreviations: ACEi, angiotensin-converting enzyme inhibitor; ARB, angiotensin-receptor blocker; CoViD-19, coronavirus disease 2019; ECMO, extracorporeal membrane oxygenation.

All studies were published in the year 2020. Studies with zero count events were excluded. Choi (analysis only included patients on antihypertensives i.e. excluded patients not on antihypertensives).

## Online Figure 14. Case-fatality rate in all patients (irrespective of history of hypertension) who had CoViD-19

### Random effects meta-analysis

Abbreviations: ACEi, angiotensin-converting enzyme inhibitor; ARB, angiotensin-receptor blocker; ARNI, angiotensin receptor-neprilysin inhibitor; CoViD-19, coronavirus disease 2019; HTN, hypertension; UK, United Kingdom; USA, United States of America.

All studies were published in the year 2020. Studies with zero count events were excluded. Benelli, Dashti, Giacomelli, Giorgi Rossi, Gupta, Iaccarino, Jung C, Nguyen and Poblador-Plou (ACEi/ARB numbers manually calculated with assumption that no patients used ACEi and ARB at the same time). Inciardi (ACEi/ARB includes ACEi/ARB/ARNI). Mehta (includes previously unpublished data from authors). Poblador-Plou (ACEi includes ACEi, plain and ACEi, combinations; ARB includes ARB, plain and ARB, combinations).

### Funnel plot

Egger’s test for small-study effects (46 studies): estimated bias coefficient -0.876, standard error 0.766, p Value = 0.259. Studies with zero count events were excluded.

# Online References

1. Trubiano JA, Vogrin S, Smibert OC, Marhoon N, Alexander AA, Chua KYL, James FL, Jones NR, Grigg SE, Xu CLH, Moini N, Stanley SR, Birrell MT, Rose MT, Gordon CL, Kwong JC, Holmes NE. COVID-MATCH65 – A prospectively derived clinical decision rule for severe acute respiratory syndrome coronavirus 2. *medRxiv* 2020.

2. Khider L, Gendron N, Goudot G, Chocron R, Hauw-Berlemont C, Cheng C, Rivet N, Pere H, Roffe A, Clerc S, Lebeaux D, Debuc B, Veyer D, Rance B, Gaussem P, Bertil S, Badoual C, Juvin P, Planquette B, Messas E, Sanchez O, Hulot J-S, Diehl J-L, Mirault T, Smadja DM. Curative anticoagulation prevents endothelial lesion in COVID-19 patients. *J Thromb Haemost* 2020;10.1111/jth.14968.

3. Dauchet L, Lambert M, Gauthier V, Poissy J, Faure K, Facon A, Yelnik C, Panaget S, Plagnieux T, Verfaillie F, Mathieu D, Goldstein P, Meirhaeghe A, Amouyel P, Lille COVID-19 study group. ACE inhibitors, AT1 receptor blockers and COVID-19: clinical epidemiology evidences for a continuation of treatments. The ACER-COVID study. *medRxiv* 2020.

4. Reilev M, Kristensen KB, Pottegård A, Lund LC, Hallas J, Ernst MT, Christiansen CF, Sørensen HT, Johansen NB, Brun NC, Voldstedlund M, Støvring H, Thomsen MK, Christensen S, Gubbels S, Krause TG, Mølbak K, Thomsen RW. Characteristics and predictors of hospitalization and death in the first 9,519 cases with a positive RT-PCR test for SARS-CoV-2 in Denmark: A nationwide cohort. *medRxiv* 2020.

5. Chang TS, Ding Y, Freund MK, Johnson R, Schwarz T, Yabu JM, Hazlett C, Chiang JN, Wulf A, Geschwind DH, Butte MJ, Pasaniuc B. Prior diagnoses and medications as risk factors for COVID-19 in a Los Angeles Health System. *medRxiv* 2020.

6. Shah SJ, Barish PN, Prasad PA, Kistler A, Neff N, Kamm J, Li LM, Chiu CY, Babik JM, Fang MC, Neudoerffer K, Langelier C, Group UC-19 HT, Working CE. Clinical features, diagnostics, and outcomes of patients presenting with acute respiratory illness: a comparison of patients with and without COVID-19. *medRxiv* 2020.

7. Rentsch CT, Kidwai-Khan F, Tate JP, Park LS, King JTJ, Skanderson M, Hauser RG, Schultze A, Jarvis CI, Holodniy M, Re III V Lo, Akgün KM, Crothers K, Taddei TH, Freiberg MS, Justice AC. Covid-19 Testing, Hospital Admission, and Intensive Care Among 2,026,227 United States Veterans Aged 54-75 Years. *medRxiv* 2020.

8. Reynolds HR, Adhikari S, Pulgarin C, Troxel AB, Iturrate E, Johnson SB, Hausvater A, Newman JD, Berger JS, Bangalore S, Katz SD, Fishman GI, Kunichoff D, Chen Y, Ogedegbe G, Hochman JS. Renin–Angiotensin–Aldosterone System Inhibitors and Risk of Covid-19. *N Engl J Med* 2020;**382**:2441–2448.

9. Mehta N, Kalra A, Nowacki AS, Anjewierden S, Han Z, Bhat P, Carmona-rubio AE, Jacob M, Procop GW, Harrington S, Milinovich A, Svensson LG, Jehi L, Young JB, Chung MK. Association of Use of Angiotensin-Converting Enzyme Inhibitors and Angiotensin II Receptor Blockers With Testing Positive for Coronavirus Disease 2019 (COVID-19). *JAMA Cardiol* 2020;e201855.

10. Huh K, Ji W, Kang M, Hong J, Bae GH, Lee R, Na Y, Choi H, Gong SY, Jung J. Association of previous medications with the risk of COVID-19: a nationwide claims-based study from South Korea. *medRxiv* 2020.

11. Dublin S, Walker R, Floyd JS, Shortreed SM, Fuller S, Albertson-Junkans L, Harrington LB, Greenwood-Hickman MA, Green BB, Psaty BM. Renin-angiotensin-aldosterone system inhibitors and COVID-19 infection or hospitalization: a cohort study. *medRxiv* 2020.

12. de Abajo FJ, Rodríguez-Martín S, Lerma V, Mejía-Abril G, Aguilar M, García-Luque A, Laredo L, Laosa O, Centeno-Soto, Gustavo A, Gálvez MÁ, Puerro M, González-Rojano E, Pedraza L, de Pablo I, Abad-Santos F, Rodríguez-Mañas L, Gil M, Tobías A, Rodríguez-Miguel A, Rodríguez-Puyol D, study Group M-A-C. Use of renin–angiotensin–aldosterone system inhibitors and risk of COVID-19 requiring admission to hospital: a case-population study. *Lancet* 2020;**395**:1705–1714.

13. Vila-Corcoles A, Satue-Gracia E, Ochoa-Gondar O, Torrente-Fraga C, Gomez-Bertomeu F, Vila-Rovira A, Hospital-Guardiola I, de Diego-Cabanes C, Bejarano-Romero F, Rovira-Veciana D, Basora-Gallisa J. Use of distinct anti-hypertensive drugs and risk for COVID-19 among hypertensive people: a population-based cohort study in Southern Catalonia, Spain. *J Clin Hypertens* 2020;

14. McKeigue PM, Kennedy S, Weir A, Bishop J, McGurnaghan, Stuart J, McAllister D, Robertson C, Wood R, Lone N, Murray J, Caparrotta TM, Smith-Palmer A, Goldberg D, McMenamin J, Ramsay C, Guthrie B, Hutchinson S, Colhoun HM. Associations of severe COVID-19 with polypharmacy in the REACT-SCOT case-control study. *medRxiv* 2020.

15. McKeigue PM, Weir A, Bishop J, McGurnaghan S, Kennedy S, Mcallister D, Robertson C, Wood R, Lone N, Murray J, Caparrotta TM, Smith-Palmer A, Goldberg D, McMenamin J, Ramsay C, Hutchinson S, Colhoun HM. Rapid Epidemiological Analysis of Comorbidities and Treatments as risk factors for COVID-19 in Scotland (REACT-SCOT): a population-based case-control study. *medrxiv* 2020.

16. Raisi-Estabragh Z, McCracken C, Ardissino M, Bethell MS, Cooper J, Cooper C, Harvey NC, Petersen SE. Renin-Angiotensin-Aldosterone System Blockers Are Not Associated With Coronavirus Disease 2019 (COVID-19) Hospitalization: Study of 1,439 UK Biobank Cases. *Front Cardiovasc Med* 2020;**7**:138.

17. Mancia G, Rea F, Ludergnani M, Apolone G, Corrao G. Renin–Angiotensin–Aldosterone System Blockers and the Risk of Covid-19. *N Engl J Med* 2020;**382**:2431–2440.

18. Gnavi R, Demaria M, Picariello R, Dalmasso M, Ricceri F, Costa G. Therapy with agents acting on the renin-angiotensin system and risk of SARS-CoV-2 infection. *Clin Infect Dis* 2020;ciaa634.

19. Fosbøl EL, Butt JH, Østergaard L, Andersson C, Selmer C, Kragholm K, Schou M, Phelps M, Gislason GH, Gislason GH, Gerds TA, Torp-Pedersen C, Køber L. Association of Angiotensin-Converting Enzyme Inhibitor or Angiotensin Receptor Blocker Use with COVID-19 Diagnosis and Mortality. *JAMA* 2020;**324**:168–177.

20. Yan H, Valdes AM, Vijay A, Wang S, Liang L, Yang S, Wang H, Tan X, Du J, Jin S, Huang K, Jiang F, Zhang S, Zheng N, Hu Y, Cai T, Aithal GP. Role of Drugs Affecting the Renin-Angiotensin-Aldosterone System on Susceptibility and Severity of COVID-19: A Large Case-Control Study from Zheijang Province, China. *medRxiv* 2020.

21. Hippisley-Cox J, Young D, Coupland C, Channon KM, Tan PS, Harrison DA, Rowan K, Aveyard P, Pavord ID, Watkinson PJ. Risk of severe COVID-19 disease with ACE inhibitors and angiotensin receptor blockers: cohort study including 8.3 million people. *Heart* 2020;**106**:1503-1511.

22. Ebinger JE, Achamallah N, Ji H, Claggett BL, Sun N, Botting P, Nguyen T-T, Luong E, Kim EH, Park E, Liu Y, Rosenberry R, Matusov Y, Zhao S, Pedraza I, Zaman T, Thompson M, Raedschelders K, Berg AH, Grein JD, Noble PW, Chugh SS, Merz CNB, Marbán E, Eyk JE Van, Solomon SD, Albert CM, Chen P, Cheng S. Pre-existing traits associated with Covid-19 illness severity. *PLoS One* 2020;**15**:e0236240.

23. Shah P, Owens J, Franklin J, Jani Y, Kumar A, Doshi R. Baseline use of angiotensin-converting enzyme inhibitor/AT1 blocker and outcomes in hospitalized coronavirus disease 2019 African-American patients. *J Hypertens* 2020.

24. Lam KW, Chow KW, Vo J, Hou W, Li H, Richman PS, Mallipattu SK, Skopicki HA, Singer AJ, Duong TQ. Continued in-hospital ACE inhibitor and ARB Use in hypertensive COVID-19 patients is associated with positive clinical outcomes. *J Infect Dis* 2020;jiaa447.

25. Nguyen AB, Upadhyay GA, Chung B, Smith B, Besser SA, Johnson JA, Blair J, Ward RP, DeCara J, Polonsky T, Patel AR, Grinstein J, Holzhauser L, Kalathiya R, Shah AP, Paul J, Nathan S, Liao J, Lang RM, Wolfe K, Adegunsoye A, Wu D, Patel B, Peek ME, Miller D, Kurian DJ, Estime SR, Dalton A, Tung A, O’Connor MF, et al. Outcomes and Cardiovascular Comorbidities in a Predominantly African-American Population with COVID-19. *medRxiv* 2020.

26. Argenziano MG, Bruce SL, Slater CL, Tiao JR, Baldwin MR, Graham Barr R, Chang BP, Chau KH, Choi JJ, Gavin N, Goyal P, Mills AM, A. PA, Romney M-LS, Safford MM, Schluger NW, Sengupta S, Sobieszczyk ME, Zucker JE, Asadourian PA, Bell FM, Boyd R, Cohen MF, Colquhoun MI, Colville LA, de Jonge JH, Dershowitz LB, Dey SA, Eiseman KA, Girvin ZP, et al. Characterization and clinical course of 1000 patients with coronavirus disease 2019 in New York: retrospective case series. *BMJ* 2020;**369**:m1996.

27. Ip A, Parikh K, Parrillo JE, Muthara S, Hansen E, Sawczuk IS, Goldberg SL. Hypertension and Renin-Angiotensin-Aldosterone System Inhibitors in Patients with Covid-19. *medRxiv* 2020.

28. Richardson S, Hirsch JS, Narasimhan M, Crawford JM, Mcginn T, Davidson KW, Northwell COVID-19 Research Consortium. Presenting Characteristics, Comorbidities, and Outcomes Among 5700 Patients Hospitalized With COVID-19 in the New York City Area. *JAMA* 2020;**323**:2052–2059.

29. Kim L, Garg S, O’Halloran A, Whitaker M, Pham H, Anderson EJ, Armistead I, Bennett NM, Billing L, Como-Sabetti K, Hill M, Kim S, Monroe ML, Muse A, Reingold A, Schaffner W, Sutton M, Talbot HK, Torres SM, Yousey-Hindes K, Holstein R, Cummings C, Brammer L, Hall A, Fry A, Langley GE. Risk Factors for Intensive Care Unit Admission and In-hospital Mortality among Hospitalized Adults Identified through the U.S. Coronavirus Disease 2019 (COVID-19)-Associated Hospitalization Surveillance Network (COVID-NET). *Clin Infect Dis* 2020;ciaa1012.

30. Gupta S, Hayek SS, Wang W, Chan L, Mathews KS, Melamed ML, Brenner SK, Leonberg-Yoo A, Schenck EJ, Radbel J, Reiser J, Bansal A, Srivastava A, Zhou Y, Sutherland A, Green A, Shehata AM, Goyal N, Vijayan A, Velez JCQ, Shaefi S, Parikh CR, Arunthamakun J, Athavale AM, Friedman AN, Short SAP, Kibbelaar ZA, Abu Omar S, Admon AJ, Donnelly JP, et al. Factors Associated With Death in Critically Ill Patients With Coronavirus Disease 2019 in the US. *JAMA Intern Med* 2020;e203596.

31. Dashti HT, Bates D, Fiskio JM, Roche EC, Mora S, Demler O. Clinical Characteristics and Severity of COVID-19 Disease in Patients from Boston Area Hospitals. *medRxiv* 2020.

32. Khera R, Clark C, Lu Y, Guo Y, Ren S, Truax B, Spatz ES, Murugiah K, Lin Z, Omer SB, Vojta D, Krumholz HM. Association of Angiotensin-Converting Enzyme Inhibitors and Angiotensin Receptor Blockers with the Risk of Hospitalization and Death in Hypertensive Patients with Coronavirus Disease-19. *medRxiv* 2020.

33. Schneeweiss M, Leonard S, Weckstein A, Schneeweiss S, Rassen JA. Renin-Angiotensin-Aldosterone-System inhibitor use in patients with COVID-19 infection and prevention of serious events: a cohort study in commercially insured patients in the US. *medRxiv* 2020.

34. De Spiegeleer A, Bronselaer A, Teo JT, Byttebier G, De Tré G, Belmans L, Dobson R, Wynendaele E, Van De Wiele C, Vandaele F, Dijck D Van, Bean D, Fedson D, De Spiegeleer B. The Effects of ARBs, ACEis, and Statins on Clinical Outcomes of COVID-19 Infection Among Nursing Home Residents. *J Am Med Dir Assoc* 2020;**21**:909–914.

35. Regina J, Papadimitriou-Olivgeris M, Burger R, Filippidis P, Tschopp J, Desgranges F, Viala B, Kampouri E, Rochat L, Haefliger D, Belkoniene M, Fidalgo C, Kritikos A, Jaton K, Senn L, Bart P-A, Pagani J-L, Manuel O, Lophitallier L. Epidemiology, risk factors and clinical course of SARS-CoV-2 infected patients in a Swiss university hospital: an observational retrospective study. *medRxiv* 2020.

36. Kormann R, Jacquot A, Alla A, Corbel A, Koszutski M, Voirin P, Garcia Parrilla M, Bevilacqua S, Schvoerer E, Gueant J-L, Namour F, Levy B, Frimat L, Oussalah A. Coronavirus disease 2019: acute Fanconi syndrome precedes acute kidney injury. *Clin Kidney J* 2020;**13**:362–370.

37. Villard O, Morquin D, Molinari N, Raingeard I, Nagot N, Cristol J-P, Jung B, Roubille C, Foulongne V, Fesler P, Lamure S, Taourel P, Konate A, Maria ATJ, Makinson A, Bertchansky I, Larcher R, Klouche K, Moing V Le, Renard E, Guilpain P. The Plasmatic Aldosterone and C-Reactive Protein Levels, and the Severity of Covid-19: The Dyhor-19 Study. *J Clin Med* 2020;**9**:2315.

38. Oussalah A, Gleye S, Clerc Urmes I, Laugel E, Callet J, Barbé F, Orlowski S, Malaplate C, Aimone-Gastin I, Caillierez BM, Merten M, Jeannesson E, Kormann R, Olivier J-L, Rodriguez-Guéant R-M, Namour F, Bevilacqua S, Losser M-R, Levy B, Kimmoun A, Gibot S, Thilly N, Frimat L, Schvoerer E, Guéant J-L. Long-Term ACE Inhibitor/ARB Use Is Associated with Severe Renal Dysfunction and Acute Kidney Injury in Patients with severe COVID-19: Results from a Referral Center Cohort in the North East of France. *Clin Infect Dis* 2020;ciaa677.

39. Liabeuf S, Moragny J, Bennis Y, Batteux B, Brochot E, Schmit JL, Lanoix J-P, Andrejak C, Ganry O, Slama M, Maizel J, Mahjoub Y, Masmoudi K, Gras-Champel V. Association between renin–angiotensin system inhibitors and COVID-19 complications. *Eur Heart J Cardiovasc Pharmacother* 2020;pvaa062.

40. Holt A, Mizrak I, Lamberts M, Lav Madsen P. Influence of inhibitors of the renin-angiotensin system on risk of acute respiratory distress syndrome in Danish hospitalized COVID-19 patients. *J Hypertens* 2020;**38**:1612–1613.

41. Baker KF, Hanrath AT, Loeff IS van der, Tee SA, Capstick R, Marchitelli G, Li A, Barr A, Eid A, Ahmed S, Bajwa D, Mohammed O, Alderson N, Lendrem C, Lendrem D, COVID-19 Control Group, COVID-19 Clinical Group, Pareja-Cebrian L, Welch A, Field J, Payne BAI, Taha Y, Price DA, Gibbins C, Schmid M, Hunter E, Duncan CJA. COVID-19 management in a UK NHS Foundation Trust with a High Consequence Infectious Diseases centre: a detailed descriptive analysis. *medRxiv* 2020.

42. Bean DM, Kraljevic Z, Searle T, Bendayan R, O’Gallagher K, Pickles A, Folarin A, Roguski L, Noor K, Shek A, Zakeri R, Shah AM, Teo JTH, Dobson RJB. Angiotensin-converting enzyme inhibitors and angiotensin II receptor blockers are not associated with severe COVID-19 infection in a multi-site UK acute hospital trust. *Eur J Heart Fail* 2020;**22**:967–974.

43. Trecarichi EM, Mazzitelli M, Serapide F, Pelle MC, Tassone B, Arrighi E, Perri G, Fusco P, Scaglione V, Davoli C, Lionello R, Gamba V La, Marrazzo G, Busceti MT, Giudice A, Ricchio M, Cancelliere A, Lio E, Procopio G, Costanzo FS, Foti DP, Matera G, Torti C, IDTM UMG COVID-19 Group. Characteristics, outcome and predictors of in-hospital mortality in an elderly population from a SARS-CoV-2 outbreak in a long-term care facility. *medRxiv* 2020.

44. Sardu C, Maggi P, Messina V, Iuliano P, Sardu A, Iovinella V, Paolisso G, Marfella R. Could anti-hypertensive drug therapy affect the clinical prognosis of hypertensive patients with COVID-19 infection? Data from centers of southern Italy. *J Am Heart Assoc* 2020;e016948.

45. Zangrillo A, Beretta L, Scandroglio AM, Monti G, Fominskiy E, Colombo S, Morselli F, Belletti A, Silvani P, Crivellari M, Monaco F, Azzolini ML, Reineke R, Nardelli P, Sartorelli M, Votta CD, Ruggeri A, Ciceri F, De Cobelli F, Tresoldi M, Dagna L, Rovere-Querini P, Neto AS, Bellomo R, Landoni G, COVID-BioB Study Group. Characteristics, treatment, outcomes and cause of death of invasively ventilated patients with COVID-19 ARDS in Milan, Italy. *Crit Care Resusc* 2020.

46. Inciardi RM, Adamo M, Lupi L, Cani DS, Pasquale M Di, Tomasoni D, Italia L, Zaccone G, Tedino C, Fabbricatore D, Curnis A, Faggiano P, Gorga E, Lombardi CM, Milesi G, Vizzardi E, Volpini M, Nodari S, Specchia C, Maroldi R, Bezzi M, Metra M. Characteristics and outcomes of patients hospitalized for COVID-19 and cardiac disease in Northern Italy. *Eur Heart J* 2020;**41**:1821–1829.

47. Felice C, Nardin C, Tanna GL Di, Grossi U, Bernardi E, Scaldaferri L, Romagnoli M, Tonon L, Cavasin P, Novello S, Scarpa R, Farnia A, De Menis E, Rigoli R, Cinetto F, Pauletto P, Agostini C, Rattazzi M. Use of RAAS inhibitors and risk of clinical deterioration in COVID-19: results from an Italian cohort of 133 hypertensives. *Am J Hypertens* 2020;hpaa096.

48. Conversano A, Melillo F, Napolano A, Fominskiy E, Spessot M, Ciceri F, Agricola E. Renin-Angiotensin-Aldosterone System Inhibitors and Outcome in Patients With SARS-CoV-2 Pneumonia: A Case Series Study. *Hypertension* 2020;**76**:e10–e12.

49. Giacomelli A, Ridolfo AL, Milazzo L, Oreni L, Bernacchia D, Siano M, Bonazzetti C, Covizzi A, Schiuma M, Passerini M, Piscaglia M, Coen M, Gubertini G, Rizzardini G, Cogliati C, Brambilla AM, Colombo R, Castelli A, Rech R, Riva A, Torre A, Meroni L, Rusconi S, Antinori S, Galli M. 30-day mortality in patients hospitalized with COVID-19 during the first wave of the Italian epidemic: A prospective cohort study. *Pharmacol Res* 2020;**158**:104931.

50. Parigi TL, Vespa E, Pugliese N. COVID-19, ACEI/ARBs and gastrointestinal symptoms: the jury is still out on the association. *Gastroenterology* 2020.

51. Benelli G, Buscarini E, Canetta C, Piana G La, Merli G, Scartabellati A, Viganò G, Sfogliarini R, Melilli G, Assandri R, Cazzato D, Rossi DS, Usai S, Caldarelli G, Gili T, Tramacere I, Pellegata G, Lauria G. SARS-COV-2 comorbidity network and outcome in hospitalized patients in Crema, Italy. *medRxiv* 2020.

52. Iaccarino G, Grassi G, Borghi C, Ferri C, Salvetti M, Volpe M. Age and Multimorbidity Predict Death Among COVID-19 Patients: Results of the SARS-RAS Study of the Italian Society of Hypertension. *Hypertension* 2020;**76**:366–372.

53. Bravi F, Flacco ME, Carradori T, Volta CA, Cosenza G, De Togni A, Martellucci CA, Parruti G, Mantovani L, Manzoli L. Predictors of severe or lethal COVID-19, including Angiotensin Converting Enzyme Inhibitors and Angiotensin II Receptor Blockers, in a sample of infected Italian citizens. *PLoS One* 2020;**15**:e0235248.

54. Giorgi Rossi P, Marino M, Formisano D, Venturelli F, Vicentini M, Grilli R, Group REC-19 W. Characteristics and outcomes of a cohort of SARS-CoV-2 patients in the Province of Reggio Emilia, Italy. *medRxiv* 2020.

55. Golpe R, Pérez-de-Llano LA, Dacal D, Guerrero-Sande H, Pombo-Vide B, Ventura-Valcárcel P. Risk of severe COVID-19 in hypertensive patients treated with renin-angiotensin-aldosterone system inhibitors. Med. Clin. (Barc). 2020.

56. Jurado A, Martín MC, Abad-Molina C, Orduña A, Martínez A, Ocaña E, Yarce O, Navas AM, Trujillo A, Fernández L, Vergara E, Rodríguez B, Quirant B, Martínez E, Hernández M, Perurena-Prieto J, Gil J, Cantenys S, González-Martínez G, Martínez-Saavedra MT, Rojo R, Marco FM, Mora S, Ontañón J, López-Hoyos M, Ocejo-Vinyals G, Melero J, Aguilar M, Almeida D, Medina S, et al. COVID-19: age, Interleukin-6, C-Reactive Protein and lymphocytes as key clues from a multicentre retrospective study in Spain. *medRxiv* 2020.

57. Hernandez Castilla E, Serrano LV, Ausejo MS, Sanchez BP, Ramrath K, Fernandez-Bravo JM. A Retrospective Cohort Study of SARS-CoV-2 Infection in Hypertenses Patients in a Primary Care Center. *SSRN Electron J* 2020.

58. Lorente-Ros A, Monteagudo Ruiz JM, Rincón LM, Ortega Pérez R, Rivas S, Martínez-Moya R, Sanromán MA, Manzano L, Alonso GL, Ibáñez B, Zamorano JL. Myocardial injury determination improves risk stratification and predicts mortality in COVID-19 patients. *Cardiol J* 2020;**27**.

59. Martínez-del Río J, Piqueras-Flores J, Nieto-Sandoval Martín de la Sierra P, Negreira-Caamaño M, Águila-Gordo D, Mateo-Gómez C, Salas-Bravo D, Rodríguez-Martínez M. Comparative analysis between the use of renin-angiotensin system antagonists and clinical outcomes of hospitalized patients with COVID-19 respiratory infection. *Med Clin* 2020.

60. López-Otero D, López-Pais J, Cacho-Antonio CE, Antúnez-Muiños PJ, González-Ferreiro T, Pérez-Poza M, Otero-García Ó, Díaz-Fernández B, Bastos-Fernández M, Bouzas-Cruz N, Sanmartín-Pena XC, Varela-Román A, Portela-Romero M, Valdés-Cuadrado L, Pose-Reino A, González-Juanatey JR. Impact of angiotensin-converting enzyme inhibitors and angiotensin receptor blockers on COVID-19 in a western population. CARDIOVID registry. *Rev Esp Cardiol (Engl Ed)* 2020.

61. Poblador-Plou B, Carmona-Pírez J, Ioakeim-Skoufa I, Poncel-Falcó A, Bliek-Bueno K, Cano-Del Pozo M, Gimeno-Feliú LA, González-Rubio F, Aza-Pascual-Salcedo M, Bandrés-Liso AC, Díez-Manglano J, Marta-Moreno J, Mucherino S, Gimeno-Miguel A, Prados-Torres A, Group E. Baseline Chronic Comorbidity and Mortality in Laboratory-Confirmed COVID-19 Cases: Results from the PRECOVID Study in Spain. *Int J Environ Res Public Health* 2020;**17**:5171.

62. Selçuk M, Çınar T, Keskin M, Çiçek V, Kılıç Ş, Kenan B, Doğan S, Asal S, Günay N, Yıldırım E, Keskin Ü, Orhan AL. Is the use of ACE inb/ARBs associated with higher in-hospital mortality in Covid-19 pneumonia patients? *Clin Exp Hypertens* 2020;**42**:738–742.

63. Şenkal N, Meral R, Medetalibeyoğlu A, Konyaoğlu H, Kose M, Tukek T. Association between chronic ACE inhibitor exposure and decreased odds of severe disease in patients with COVID-19. *Anatol J Cardiol* 2020;**24**:21–29.

64. Ayed M, Borahmah A, Yazdani A, Sultan A, Mossad A, Rawdhan H. Assessment of clinical characteristics and mortality-associated factors in COVID-19 Critical cases in Kuwait. *medRxiv* 2020.

65. Zhou X, Zhu J, Xu T. Clinical characteristics of coronavirus disease 2019 (COVID-19) patients with hypertension on renin–angiotensin system inhibitors. *Clin Exp Hypertens* 2020;**42**:656–660.

66. Meng J, Xiao G, Zhang J, He X, Ou M, Bi J, Yang R, Di W, Wang Z, Li Z, Gao H, Liu L, Zhang G. Renin-angiotensin system inhibitors improve the clinical outcomes of COVID-19 patients with hypertension. *Emerg Microbes Infect* 2020;**9**:757–760.

67. Huang Z, Cao J, Yao Y, Jin X, Luo Z, Xue Y, Zhu C, Song Y, Wang Y, Zou Y, Qian J, Yu K, Gong H, Ge J. The effect of RAS blockers on the clinical characteristics of COVID-19 patients with hypertension. *Ann Transl Med* 2020;**8**:430.

68. Liu Y, Huang F, Xu J, Yang P, Qin Y, Cao M, Wang Z, Li X, Zhang S, Ye L, Lv J, Wei J, Xie T, Gao H, X KF, Wang F, Liu L, Jiang C. Anti-hypertensive Angiotensin II receptor blockers associated to mitigation of disease severity in elderly COVID-19 patients. *medRxiv* 2020.

69. Feng Z, Li J, Yao S, Yu Q, Zhou W, Mao X, Li H, Kang W, Ouyang X, Mei J, Zeng Q, Liu J, Ma X, Rong P, Wang W. Clinical Factors Associated with Progression and Prolonged Viral Shedding in COVID-19 Patients: A Multicenter Study. *Aging Dis* 2020.

70. Zeng Z, Sha T, Zhang Y, Wu F, Hu H, Li H, Han J, Song W, Huang Q, Chen Z. Hypertension in patients hospitalized with COVID-19 in Wuhan, China: A single-center retrospective observational study. *medRxiv* 2020.

71. Ashraf MA, Shokouhi N, Shirali E, Davari-tanha F, Memar O, Kamalipour A, Azarnoush A, Mabadi A, Ossareh A, Sanginabadi M, Mokhtari Azad T, Aghaghazvini L, Ghaderkhani S, Poordast T, Pourdast A, Nazemi P. COVID-19 in Iran, a comprehensive investigation from exposure to treatment outcomes. *medRxiv* 2020.

72. Feng Y, Ling Y, Bai T, Xie Y, Huang J, Li J, Xiong W, Yang D, Chen R, Lu F, Lu Y, Liu X, Chen Y, Li X, Li Y, Summah HD, Lin H, Yan J, Zhou M, Lu H, Qu J. COVID-19 With Different Severities: A Multicenter Study of Clinical Features. *Am J Respir Crit Care Med* 2020;**201**:1380–1388.

73. Tan N-D, Qiu Y, Xing X-B, Ghosh S, Chen M-H, Mao R. Associations between Angiotensin Converting Enzyme Inhibitors and Angiotensin II Receptor Blocker Use, Gastrointestinal Symptoms, and Mortality among Patients with COVID-19. *Gastroenterology* 2020;**159**:1170-1172.

74. Xu J, Huang C, Fan G, Liu Z, Shang L, Zhou F, Wang Y, Yu J, Yang L, Xie K, Huang Z, Huang L, Gu X, Li H, Zhang Y, Wang Y, Hayden FG, Horby PW, Cao B, Wang C. Use of angiotensin-converting enzyme inhibitors and angiotensin II receptor blockers in context of COVID-19 outbreak: a retrospective analysis. *Front Med* 2020.

75. Chen M, Fan Y, Wu X, Zhang L, Guo T, Deng K, Cao J, Luo H, He T, Gong Y, Wang H, Wan J, Wang X, Lu Z. Clinical Characteristics and Risk Factors for Fatal Outcome in Patients with 2019-Coronavirus Infected Disease (COVID-19) in Wuhan, China. *SSRN Electron J* 2020.

76. Yang G, Tan Z, Zhou L, Yang M, Peng L, Liu J, Cai J, Yang R, Han J, Huang Y, He S. Effects of Angiotensin II Receptor Blockers and ACE (Angiotensin-Converting Enzyme) Inhibitors on Virus Infection, Inflammatory Status, and Clinical Outcomes in Patients With COVID-19 and Hypertension: A Single Center Retrospective Study. *Hypertension* 2020;**76**:51–58.

77. Hu J, Zhang X, Zhang X, Zhao H, Lian J, Hao S, Jia H, Yang M, Lu Y, Xiang D, Cai H, Zhang S, Gu J, Ye C, Yu G, Jin C, Zheng L, Yang Y, Sheng J. COVID-19 is more severe in patients with hypertension; ACEI/ARB treatment does not infulence clinical severity and outcome. J Infect 2020.

78. Liu X, Liu Y, Chen K, Yan S, Bai X, Li J, Liu D. Efficacy of ACEIs/ARBs versus CCBs on the progression of COVID-19 patients with hypertension in Wuhan: A hospital-based retrospective cohort study. *J Med Virol* 2020;10.1002/jmv.26315.

79. Guo T, Fan Y, Chen M, Wu X, Zhang L, He T, Wang H, Wan J, Wang X, Lu Z. Cardiovascular Implications of Fatal Outcomes of Patients With Coronavirus Disease 2019 (COVID-19). *JAMA Cardiol* 2020;**5**:1–8.

80. Pan W, Zhang J, Wang M, Ye J, Xu Y, Shen B, He H, Wang Z, Ye D, Zhao M, Luo Z, Liu M, Zhang P, Gu J, Liu M, Li D, Liu J, Wan J. Clinical Features of COVID-19 in Patients With Essential Hypertension and the Impacts of Renin-angiotensin-aldosterone System Inhibitors on the Prognosis of COVID-19 Patients. *Hypertension* 2020;**76**:732–741.

81. Wang Y, Lu X, Li Y, Chen H, Chen T, Su N, Huang F, Zhou J, Zhang B, Yan F, Wang J. Clinical Course and Outcomes of 344 Intensive Care Patients with COVID-19. *Am J Respir Crit Care Med* 2020;**201**:1430‐1434.

82. Li J, Wang X, Chen J, Zhang H, Deng A. Association of Renin-Angiotensin System Inhibitors With Severity or Risk of Death in Patients With Hypertension Hospitalized for Coronavirus Disease 2019 (COVID-19) Infection in Wuhan, China. *JAMA Cardiol* 2020;**5**:825–830.

83. Li X, Xu S, Yu M, Wang K, Tao Y, Zhou Y, Shi J, Zhou M, Wu B, Yang Z, Zhang C, Yue J, Zhang Z, Renz H, Liu X, Xie J, Xie M, Zhao J. Risk factors for severity and mortality in adult COVID-19 inpatients in Wuhan. *J Allergy Clin Immunol* 2020;**146**:110–118.

84. Gao C, Cai Y, Zhang K, Zhou L, Zhang Y, Zhang X, Li Q, Li W, Yang S, Zhao X, Zhao Y, Wang H, Liu Y, Yin Z, Zhang R, Wang R, Yang M, Hui C, Wijns W, Mcevoy JW, Soliman O, Onuma Y, Serruys PW, Serruys PW, Tao L, Li F. Association of hypertension and antihypertensive treatment with COVID-19 mortality: a retrospective observational study. *Eur Heart J* 2020;**41**:2058–2066.

85. Zhou J, Tse G, Lee S, Liu T, Wu WKK, Cao Z, Zeng DD, Wong ICK, Zhang Q, Cheung BMY. Identifying main and interaction effects of risk factors to predict intensive care admission in patients hospitalized with COVID-19: a retrospective cohort study in Hong Kong. *medRxiv* 2020.

86. Zeng H, Zhang T, He X, Du Y, Tong Y, Zhang W, Shen Y. Impact of Hypertension on Progression and Prognosis in Patients with COVID-19 A Retrospective Cohort Study in 1031 Hospitalized Cases in Wuhan, China. *medRxiv* 2020.

87. Zhang P, Zhu L, Cai J, Lei F, Qin JJ, Xie J, Liu YM, Zhao YC, Huang X, Lin L, Xia M, Chen MM, Cheng X, Zhang X, Guo D, Peng Y, Ji YX, Chen J, She ZG, Wang Y, Xu Q, Tan R, Wang H, Lin J, Luo P, Fu S, Cai H, Ye P, Xiao B, Mao W, et al. Association of Inpatient Use of Angiotensin Converting Enzyme Inhibitors and Angiotensin II Receptor Blockers with Mortality Among Patients With Hypertension Hospitalized With COVID-19. *Circ Res* 2020;**126**:1671–1681.

88. Hwang J-M, Kim J-H, Park J-S, Chang MC, Park D. Neurological diseases as mortality predictive factors for patients with COVID-19: a retrospective cohort study. *Neurol Sci* 2020;**41**:2317–2324.

89. Kim JH, Baek Y-H, Lee H, Choe YJ, Shin HJ, Shin J-Y. Clinical Outcomes From COVID-19 Following Use of Angiotensin-Converting Enzyme Inhibitors or Angiotensin-Receptor Blockers Among Patients with Hypertension in South Korea: A nationwide study. *medRxiv* 2020.

90. Choi HK, Koo H-J, Seok H, Jeon JH, Choi WS, Kim DJ, Park DW, Han E. ARB/ACEI use and severe COVID-19: a nationwide case-control study. *medRxiv* 2020.

91. Jung S-Y, Choi JC, You S-H, Kim W-Y. Association of renin-angiotensin-aldosterone system inhibitors with COVID-19-related outcomes in Korea: a nationwide population-based cohort study. *Clin Infect Dis* 2020;ciaa624.

92. Lee H-Y, Ahn J, Kang CK, Won S-H, Park J-H, Kang CH, Chung K-H, Joh J-S, Bang J, Yoo H, Park O, Oh M. Association of angiotensin II receptor blockers and angiotensin-converting enzyme inhibitors on COVID-19-related outcome. *SSRN Electron J* 2020.

93. Jung C, Bruno RR, Wernly B, Joannidis M, Oeyen S, Zafeiridis T, Marsh B, Andersen FH, Moreno R, Fernandes AM, Artigas A, Pinto BB, Schefold J, Wolff G, Kelm M, De Lange DW, Guidet B, Flaatten H, Fjølner J. Inhibitors of the Renin-Angiotensin-Aldosterone System and Covid-19 in critically ill elderly patients. *Eur Heart J Cardiovasc Pharmacother* 2020;pvaa083.

94. National Health Commission & National Administration of Traditional Chinese Medicine. Diagnosis and Treatment Protocol for Novel Coronavirus Pneumonia (Trial Version 7). *Chin Med J* 2020;**133**:1087–1095.

95. World Health Organization (WHO). Clinical management of severe acute respiratory infection when novel coronavirus (‎‎‎‎‎2019-nCoV)‎‎‎‎‎ infection is suspected: interim guidance, 28 January 2020. World Health Organization; 2020.

96. Metlay JP, Waterer GW, Long AC, Anzueto A, Brozek J, Crothers K, Cooley LA, Dean NC, Fine MJ, Flanders SA, Griffin MR, Metersky ML, Musher DM, Restrepo MI, Whitney CG. Diagnosis and Treatment of Adults with Community-acquired Pneumonia. An Official Clinical Practice Guideline of the American Thoracic Society and Infectious Diseases Society of America. *Am J Respir Crit Care Med* 2019;**200**:e45–e67.

97. Gill D, Arvanitis M, Carter P, Hernández Cordero AI, Jo B, Karhunen V, Larsson SC, Li X, Lockhart SM, Mason A, Pashos E, Saha A, Tan VY, Zuber V, Bossé Y, Fahle S, Hao K, Jiang T, Joubert P, Lunt AC, Ouwehand WH, Roberts DJ, Timens W, Berge M van den, Watkins NA, Battle A, Butterworth AS, Danesh J, Engelhardt BE, Peters JE, et al. ACE inhibition and cardiometabolic risk factors, lung ACE2 and TMPRSS2 gene expression, and plasma ACE2 levels: a Mendelian randomization study. *medRxiv* 2020.

98. Curtis D. Coding variants in ACE2 and TMPRSS2 are not major drivers of COVID-19 severity in UK Biobank subjects. *medRxiv* 2020.

99. COVID-19 Host Genetics Initiative. The COVID-19 Host Genetics Initiative, a global initiative to elucidate the role of host genetic factors in susceptibility and severity of the SARS-CoV-2 virus pandemic. *Eur J Hum Genet* 2020;**28**:715–718.

100. Stroup DF, Berlin JA, Morton SC, Olkin I, Williamson GD, Rennie D, Moher D, Becker BJ, Sipe TA, Thacker SB. Meta-analysis of Observational Studies in Epidemiology: A Proposal for Reporting. Meta-analysis Of Observational Studies in Epidemiology (MOOSE) Group. *JAMA* 2000;**283**:2008–2012.

# Online Appendix 1. Meta-analysis Of Observational Studies in Epidemiology (MOOSE) Checklist

| **Reporting Criteria** 100 | **Reported on Page Number** |
| --- | --- |
| **Background** | |
| Problem definition | 4, 7-8 |
| Hypothesis statement | 4, 7-8 |
| Description of study outcome(s) | 4, 7-12 |
| Type of exposure or intervention used | 4, 7-12 |
| Type of study designs used | 4, 7-12, Figure 1 |
| Study population | 4, 7-12 |
| **Search strategy** | |
| Qualifications of searchers (e.g., librarians and investigators) | 9 |
| Search strategy, including time period included in the synthesis and keywords | 4, 9-10, Online Appendix 2 |
| Effort to include all available studies, including contact with authors | 9-12, Figure 1 |
| Databases and registries searched | 4, 9, Online Appendix 2 |
| Search software used, name and version, including special features used (e.g., explosion) | 9, Online Appendix 2 |
| Use of hand searching (e.g., reference lists of obtained articles) | 9, Figure 1 |
| List of citations located and those excluded, including justification | 10-12, Figure 1, Online Table 1 |
| Method of addressing articles published in languages other than English | 4, 9 |
| Method of handling abstracts and unpublished studies | 4, 9-12, Figure 1, Online Figures 5A-F |
| Description of any contact with authors | 10, Online Table 1 |
| **Methods** | |
| Description of relevance or appropriateness of studies assembled for assessing the hypothesis to be tested | 4, 8-12 |
| Rationale for the selection and coding of data (e.g., sound clinical principles or convenience) | 4, 8-12 |
| Documentation of how data were classified and coded (e.g., multiple raters, blinding, and interrater reliability) | 4, 9-12 |
| Assessment of confounding (e.g., comparability of cases and controls in studies where appropriate) | 4, 8, 10-12, 18-20, Online Figures 1-3 |
| Assessment of study quality, including blinding of quality assessors; stratification or regression on possible predictors of study results | 4, 11-12, Online Figures 1-3 |
| Assessment of heterogeneity | 11 |
| Description of statistical methods (e.g., complete description of fixed or random effects models, justification of whether the chosen models account for predictors of study results, dose-response models, or cumulative meta-analysis) in sufficient detail to be replicated | 4, 9-12 |
| Provision of appropriate tables and graphics | Figures 1-8, Online Table 1, Online Central Figure, Online Figures 1-14 |
| **Results** | |
| Graphic summarizing individual study estimates and overall estimate | Figures 2-8, Online Figures 4-14 |
| Table giving descriptive information for each study included | Online Table 1 |
| Results of sensitivity testing (e.g., subgroup analysis) | 16, Online Figures 4-6 |
| Indication of statistical uncertainty of findings | 7-8, 13-20, Figures 2-8, Online Figures 4-14 |
| **Discussion** | |
| Quantitative assessment of bias (e.g., publication bias) | 11-20, Figures 4B, 5B, 7B, 8B, Online Figures 7B, 8B, 9B, 10B, 12B, 14B |
| Justification for exclusion (e.g., exclusion of non–English-language citations) | 9-12, 15-16, 18-20, Figure 1, Online Table 1, Supplemental Results |
| Assessment of quality of included studies | 4, 11-12, Online Figures 1-3 |
| **Conclusions** | |
| Consideration of alternative explanations for observed results | 18-21 |
| Generalization of the conclusions (i.e., appropriate for the data presented and within the domain of the literature review) | 18-21 |
| Guidelines for future research | 18-21 |
| Disclosure of funding source | 22 |

# Online Appendix 2. Electronic Database Search Strategy

## Search terms

1. Population: ‘severe acute respiratory syndrome’ OR ‘SARS’ OR ‘severe acute respiratory syndrome-coronavirus-2’ OR ‘SARS-CoV-2’ OR ‘coronavirus’ OR ‘coronavirus disease’ OR ‘COVID’ OR ‘coronavirus disease 2019’ OR ‘COVID-19’ OR ‘novel coronavirus’ OR ‘nCoV’ OR ‘2019-nCoV’
2. Intervention and Comparator: ‘renin angiotensin system’ OR ‘renin-angiotensin system’ OR RAS OR ‘renin angiotensin system blocker’ OR ‘renin-angiotensin system blocker’ OR ‘RAS blocker’ OR angiotensin OR ‘angiotensin-converting enzyme’ OR ‘ACE’ OR ‘angiotensin-converting enzyme inhibitor’ OR ‘ACE inhibitor’ OR ‘angiotensin receptor blocker’ OR ‘angiotensin-receptor blocker’ OR ‘angiotensin II receptor blocker’ OR ‘ARB’
3. Study type: ‘observational’ OR ‘cohort’ OR ‘case’ OR ‘case control’ OR ‘case-control’ OR ‘case series’ OR ‘epidemiologic’ OR ‘epidemiological’ OR ‘population’
4. Outcome: ‘hospital’ OR ‘hospitalization’ or ‘hospitalisation’ OR ‘complications’ OR ‘severity’ OR ‘severe’ OR ‘critical’ OR ‘intensive care unit’ OR ‘ICU’ OR ‘intensive therapy unit’ OR ‘ITU’ OR ‘ventilation’ OR ‘mechanical ventilation’ OR ‘ventilator’ OR ‘mortality’ OR ‘death’ OR ‘fatal’ OR ‘fatality’ OR ‘case fatality’ OR ‘case-fatality’
5. Filters: human

**Example: EMBASE**

1. (‘severe acute respiratory syndrome’ OR ‘SARS’ OR ‘severe acute respiratory syndrome-coronavirus-2’ OR ‘SARS-CoV-2’ OR ‘coronavirus’ OR ‘coronavirus disease’ OR ‘COVID’ OR ‘coronavirus disease 2019’ OR ‘COVID-19’ OR ‘novel coronavirus’ OR ‘nCoV’ OR ‘2019-nCoV’)
2. (‘renin angiotensin system’ OR ‘renin-angiotensin system’ OR ‘RAS’ OR ‘renin angiotensin system blocker’ OR ‘renin-angiotensin system blocker’ OR ‘RAS blocker’ OR angiotensin OR ‘angiotensin-converting enzyme’ OR ‘ACE’ OR ‘angiotensin-converting enzyme inhibitor’ OR ‘ACE inhibitor’ OR ‘angiotensin receptor blocker’ OR ‘angiotensin-receptor blocker’ OR ‘angiotensin II receptor blocker’ OR ‘ARB’)
3. (‘observational’ OR ‘cohort’ OR ‘case’ OR ‘case control’ OR ‘case-control’ OR ‘case series’ OR ‘epidemiologic’ OR ‘epidemiological’ OR ‘population’)
4. (‘hospital’ OR ‘hospitalization’ or ‘hospitalisation’ OR ‘complications’ OR ‘severity’ OR ‘severe’ OR ‘critical’ OR ‘intensive care unit’ OR ‘ICU’ OR ‘intensive therapy unit’ OR ‘ITU’ OR ‘ventilation’ OR ‘mechanical ventilation’ OR ‘ventilator’ OR ‘mortality’ OR ‘death’ OR ‘fatal’ OR ‘fatality’ OR ‘case fatality’ OR ‘case-fatality’)
5. (‘human’)
6. #1 AND #2 AND #3 AND #5
7. #4 AND #6

**Example: medRxiv**

(“SARS” OR “SARS-CoV-2” OR “coronavirus” OR “COVID” OR “COVID-19” OR “nCoV”)

AND

(“renin angiotensin” OR “angiotensin” OR “ACE” OR “angiotensin-converting enzyme inhibitor” OR “ACE inhibitor” OR “angiotensin receptor blocker” OR “ARB”)

AND

(“observational” OR “cohort” OR “case” OR “case control” OR “case series”)

AND

(“hospital” OR “severe” OR “critical” OR “intensive care unit” OR “ICU” OR “ITU” OR “ventilation” OR “mortality” OR “death” OR “fatal”)

AND

(“human”)
